# Supplementary material for: Definition of immune molecular subtypes with distinct immune microenvironment, recurrence, and PANoptosis features to aid clinical therapeutic decision-making
Source: Front Genet. 2022 Oct 13;13:1007108. doi: 10.3389/fgene.2022.1007108 (PMC9606342; doi:10.3389/fgene.2022.1007108)
Supplement: Supplementary file 9 [file Table5.XLSX]

## Sheet: Sheet1
DEGs	logFC	AveExpr	t	P.Value	adj.P.Val	B
TMPRSS3	2.91301	3.00467	-13.9372	4.29665e-30	8.33378e-26	57.4802
FAM83C	-3.72175	3.39286	12.9303	3.34635e-27	2.48665e-23	50.9941
VSNL1	-3.24055	4.17049	12.9093	3.84613e-27	2.48665e-23	50.8584
DSG3	-4.9387	6.28085	12.8356	6.26204e-27	3.03646e-23	50.3832
GBP6	-4.20514	4.22384	12.7019	1.51673e-26	5.88369e-23	49.5208
DENND2C	-2.30203	2.97637	12.3483	1.57139e-25	5.07978e-22	47.2409
DSC3	-4.67494	6.15484	12.3008	2.14978e-25	5.95672e-22	46.9352
CLCA2	-4.72784	5.59434	12.1363	6.37485e-25	1.44923e-21	45.875
P2RY1	-2.62211	3.39479	12.1282	6.72462e-25	1.44923e-21	45.8229
IVL	-4.23793	4.61002	11.8452	4.34572e-24	8.42897e-21	44.0025
PKP1	-4.29802	6.8964	11.7678	7.23485e-24	1.2757e-20	43.5052
TINCR	-2.739	3.74797	11.5354	3.33851e-23	5.39615e-20	42.0131
GRHL3	-2.65592	4.64585	11.4865	4.60093e-23	6.68061e-20	41.7001
RAB17	2.15985	2.85704	-11.4794	4.82205e-23	6.68061e-20	41.6543
RGL3	2.79501	2.05809	-11.2297	2.47923e-22	3.20581e-19	40.0565
NPL	-1.37311	3.89508	11.1304	4.74771e-22	5.75541e-19	39.4224
FOXN1	-2.66198	3.56631	11.1144	5.27211e-22	6.01517e-19	39.3201
KRT18	1.91385	9.06839	-11.097	5.90549e-22	6.36349e-19	39.2094
TP63	-3.77474	5.57037	11.0401	8.56832e-22	8.74691e-19	38.8462
PARD6G	-1.84778	4.18884	11.0294	9.18807e-22	8.91059e-19	38.778
CALML3	-4.85391	6.65724	10.8616	2.7435e-21	2.53395e-18	37.7104
FAT2	-2.78614	4.48726	10.7605	5.29849e-21	4.67134e-18	37.068
INKA1	-2.07798	4.43538	10.7137	7.18484e-21	6.05901e-18	36.7707
TMPRSS11D	-4.27322	4.08146	10.6473	1.10576e-20	8.93638e-18	36.3499
KRT6C	-4.06196	4.57369	10.55	2.07748e-20	1.61179e-17	35.7344
CSTA	-3.86526	7.90902	10.4678	3.53724e-20	2.63878e-17	35.215
CERS3	-3.08607	2.91111	10.4499	3.96995e-20	2.85189e-17	35.1024
SPRR1A	-5.17971	6.94107	10.4089	5.17543e-20	3.58509e-17	34.8435
ZNF69	1.56871	1.45985	-10.3885	5.90249e-20	3.94775e-17	34.7152
PGLYRP3	-3.14601	3.15197	10.3695	6.67401e-20	4.31497e-17	34.5954
AKR1B10	-3.62752	5.04385	10.3528	7.43664e-20	4.65293e-17	34.4898
SPRR1B	-5.08277	7.22569	10.2525	1.41931e-19	8.60276e-17	33.8589
MISP	2.4714	5.77415	-10.0856	4.14728e-19	2.4376e-16	32.8124
RAB34	0.946862	6.47476	-10.0555	5.02976e-19	2.86933e-16	32.6242
KRT16	-3.88561	8.81144	10.0199	6.31924e-19	3.50194e-16	32.4014
LYPD3	-2.97468	7.65439	10.0105	6.71344e-19	3.5885e-16	32.3424
POU3F1	-1.70577	1.66638	10.0074	6.84546e-19	3.5885e-16	32.3234
ZNF750	-2.57094	5.15842	9.91596	1.22855e-18	6.2708e-16	31.7526
SERPINB13	-3.98479	5.10749	9.91043	1.27272e-18	6.32968e-16	31.7182
A2ML1	-3.26846	3.98786	9.89491	1.40529e-18	6.81425e-16	31.6215
KRT15	-3.6443	7.11455	9.75296	3.47171e-18	1.64237e-15	30.739
UBXN10	2.06288	1.53311	-9.74268	3.70618e-18	1.71155e-15	30.6752
CAPNS2	-3.34733	4.07891	9.68918	5.20648e-18	2.31338e-15	30.3435
DSC2	-1.98756	5.39664	9.68793	5.24793e-18	2.31338e-15	30.3358
GM2A	-1.21487	7.22927	9.68435	5.36854e-18	2.31396e-15	30.3136
KRT5	-4.28979	10.7886	9.59809	9.2751e-18	3.91086e-15	29.7801
SPRR3	-4.84292	5.95856	9.57501	1.07334e-17	4.35521e-15	29.6376
ZNF385A	-1.48354	6.75663	9.57279	1.08853e-17	4.35521e-15	29.6239
GPNMB	-2.20809	6.959	9.5711	1.10025e-17	4.35521e-15	29.6135
WWC1	1.23653	4.00264	-9.50029	1.72113e-17	6.67662e-15	29.1769
BMP7	-2.61794	4.42136	9.47147	2.06436e-17	7.85106e-15	28.9995
SEMA3B	2.14557	3.75808	-9.439	2.53321e-17	9.44888e-15	28.7999
TMEM79	-1.58467	5.56879	9.42944	2.69044e-17	9.84601e-15	28.7411
PCP4L1	-3.12864	3.50401	9.42286	2.80432e-17	1.00727e-14	28.7007
PERP	-1.61121	9.75847	9.41969	2.86083e-17	1.00888e-14	28.6812
C10orf99	-4.02593	4.68291	9.41168	3.00867e-17	1.04208e-14	28.6321
MTSS1	-1.94965	4.39578	9.34166	4.67285e-17	1.59008e-14	28.2026
KRT6A	-4.27297	9.92324	9.33361	4.91513e-17	1.64369e-14	28.1533
RHPN2	1.64183	4.19354	-9.27711	7.0056e-17	2.30306e-14	27.8076
WNT2B	-1.47029	1.96234	9.24584	8.52119e-17	2.75462e-14	27.6165
TMPRSS11A	-3.43658	2.83868	9.22791	9.5329e-17	3.03115e-14	27.5071
GOLM1	1.4096	6.372	-9.21789	1.01497e-16	3.17523e-14	27.446
EDDM13	-1.45902	1.58951	9.19995	1.13545e-16	3.49576e-14	27.3366
GNA15	-1.52375	6.63288	9.17966	1.28893e-16	3.90625e-14	27.2129
RAB20	1.32372	5.53987	-9.16918	1.37608e-16	4.08635e-14	27.1491
ENTPD8	1.91951	1.40239	-9.16751	1.39049e-16	4.08635e-14	27.1389
KRT6B	-3.87776	6.62192	9.1522	1.52991e-16	4.42899e-14	27.0457
SPINK5	-3.07121	4.20718	9.1461	1.58929e-16	4.53322e-14	27.0086
SPRR2D	-4.1088	4.91523	9.13486	1.70464e-16	4.79176e-14	26.9403
SHROOM3	1.53837	3.13579	-9.1222	1.84467e-16	5.11131e-14	26.8633
S100A8	-4.11911	10.2767	9.11772	1.8969e-16	5.12e-14	26.836
SPRR2A	-4.27972	5.74339	9.11741	1.9006e-16	5.12e-14	26.8341
FGFR3	-2.06633	6.1068	9.07383	2.49299e-16	6.61814e-14	26.5695
TMPRSS11E	-3.47164	3.5608	9.07178	2.52497e-16	6.61814e-14	26.5571
DOK7	1.64689	1.78906	-9.0625	2.67503e-16	6.82696e-14	26.5008
GJB6	-3.44893	4.50119	9.0287	3.30053e-16	8.31391e-14	26.2959
FABP5	-2.87784	8.02424	9.00348	3.85981e-16	9.55797e-14	26.1433
AKR1B15	-1.99815	2.34062	9.00211	3.89297e-16	9.55797e-14	26.1349
SLC10A6	-2.16	2.31152	8.98052	4.45071e-16	1.07907e-13	26.0044
HSPB1	-1.39281	11.8926	8.94436	5.56832e-16	1.33337e-13	25.7859
MBD2	-0.730814	6.19887	8.91825	6.54484e-16	1.54809e-13	25.6284
SLC9A9	-1.51171	2.5474	8.90992	6.89099e-16	1.61033e-13	25.5781
SLC41A2	1.30355	2.69428	-8.89451	7.57975e-16	1.7421e-13	25.4852
HRCT1	1.52476	1.5043	-8.89334	7.6345e-16	1.7421e-13	25.4782
IGSF3	-1.41081	5.48792	8.87455	8.57407e-16	1.93375e-13	25.3651
ALDH3B1	1.58141	3.53803	-8.75716	1.76712e-15	3.93967e-13	24.66
CHKA	1.1551	4.05504	-8.74473	1.90737e-15	4.20403e-13	24.5856
NECTIN1	-1.56908	6.6167	8.71369	2.30765e-15	5.02912e-13	24.3999
DUOXA1	-1.85836	4.83798	8.69979	2.51305e-15	5.4159e-13	24.3168
PPP2R3A	-1.29279	3.4902	8.67835	2.86586e-15	6.10837e-13	24.1887
SCCPDH	1.55269	5.59631	-8.6737	2.9487e-15	6.21662e-13	24.1609
TEKT2	2.05718	1.7706	-8.65053	3.39801e-15	7.08687e-13	24.0227
PNKD	1.02776	5.24358	-8.62779	3.90494e-15	8.05748e-13	23.8872
PPP1R9A	1.46944	0.914792	-8.62297	4.02165e-15	8.21093e-13	23.8585
KLHL21	-1.12469	5.1421	8.59951	4.64111e-15	9.37698e-13	23.7189
BNC1	-2.81005	4.10669	8.58098	5.1968e-15	1.03915e-12	23.6086
TOM1L2	-1.09155	4.78831	8.57179	5.49616e-15	1.08779e-12	23.5541
FAM166C	1.44881	0.913144	-8.56151	5.85174e-15	1.14647e-12	23.493
CD63	0.659297	9.43264	-8.55908	5.93898e-15	1.15192e-12	23.4786
HID1	2.06742	3.52811	-8.55048	6.25853e-15	1.20189e-12	23.4275
BCL11B	-1.3909	2.38899	8.52477	7.31902e-15	1.39176e-12	23.2749
GJB5	-2.11054	6.28231	8.49953	8.53297e-15	1.60685e-12	23.1254
CLCA4	-3.08768	3.55637	8.49513	8.76422e-15	1.63143e-12	23.0994
MAFB	-1.42004	5.45345	8.49387	8.83171e-15	1.63143e-12	23.0919
SPDEF	2.96687	3.44715	-8.49077	8.99943e-15	1.64673e-12	23.0735
DDAH1	1.87249	3.89454	-8.48024	9.59396e-15	1.73911e-12	23.0112
ADH7	-3.48895	3.26692	8.46213	1.07087e-14	1.9232e-12	22.9041
EFS	-1.7345	5.58818	8.45767	1.1002e-14	1.95776e-12	22.8778
TMEM154	-1.41083	3.07376	8.45075	1.14738e-14	2.02314e-12	22.8369
ACSF2	1.32059	4.54063	-8.44678	1.17536e-14	2.05381e-12	22.8134
CABP4	1.28976	1.34997	-8.4372	1.24563e-14	2.15716e-12	22.7568
JUP	-0.989414	9.57979	8.43393	1.2705e-14	2.18076e-12	22.7376
PALM3	2.06085	1.83979	-8.4159	1.41711e-14	2.41107e-12	22.6312
EPOR	1.3227	2.89081	-8.40664	1.49879e-14	2.52788e-12	22.5766
SH3BP1	-0.882285	5.17574	8.39187	1.63889e-14	2.74034e-12	22.4895
FAM83G	-1.04381	4.81365	8.38533	1.70499e-14	2.82649e-12	22.451
RNF19B	-0.907755	6.74491	8.38001	1.76072e-14	2.89415e-12	22.4197
REEP4	-0.804202	7.03487	8.36586	1.91787e-14	3.12597e-12	22.3364
THBD	-2.04131	5.37393	8.3624	1.95838e-14	3.16539e-12	22.316
HES2	-2.17997	4.77677	8.35653	2.02903e-14	3.25248e-12	22.2815
CRACR2B	2.0569	3.719	-8.31456	2.61347e-14	4.15499e-12	22.0349
TMEM117	-0.946824	3.65375	8.27491	3.31787e-14	5.23198e-12	21.8025
BEND7	1.34788	1.56693	-8.2706	3.40508e-14	5.3262e-12	21.7772
OSTF1	-0.641645	7.55932	8.2501	3.85144e-14	5.9762e-12	21.6572
PKN1	1.26369	5.96949	-8.24179	4.04854e-14	6.23218e-12	21.6086
TPM2	1.49576	6.79246	-8.23953	4.10378e-14	6.26747e-12	21.5954
BICD2	-1.25492	5.70538	8.22275	4.53856e-14	6.87733e-12	21.4974
GPR87	-2.74255	6.13951	8.19933	5.22256e-14	7.85246e-12	21.3606
DNALI1	2.42159	1.92786	-8.18668	5.63351e-14	8.40519e-12	21.2869
SH3BGRL3	-0.686541	9.02774	8.1791	5.89483e-14	8.72794e-12	21.2427
SFN	-1.77056	11.7211	8.17036	6.21142e-14	9.12703e-12	21.1918
CDK5R1	-1.15682	3.07567	8.16568	6.38789e-14	9.31575e-12	21.1645
TNNC1	1.99884	2.27017	-8.14677	7.15234e-14	1.03527e-11	21.0544
LTB4R2	-1.16796	2.89453	8.13655	7.60251e-14	1.09228e-11	20.995
VEPH1	0.93999	0.664146	-8.13026	7.89308e-14	1.11748e-11	20.9585
AP2B1	1.22255	5.97398	-8.11582	8.60367e-14	1.20925e-11	20.8745
CLEC7A	-1.74385	3.37207	8.11327	8.73565e-14	1.2108e-11	20.8597
N4BP1	-0.755185	5.10846	8.11319	8.73952e-14	1.2108e-11	20.8593
FGFRL1	1.25601	3.95684	-8.09721	9.61333e-14	1.32241e-11	20.7665
DSP	-1.38158	8.29079	8.07925	1.06986e-13	1.46134e-11	20.6624
ATP1B3	-1.12584	8.70448	8.0722	1.11576e-13	1.51337e-11	20.6215
MAPKBP1	-1.04203	3.63707	8.04991	1.27393e-13	1.71592e-11	20.4924
RAP2B	-1.07945	6.39484	8.02792	1.45172e-13	1.9419e-11	20.3652
TMEM40	-1.95606	4.29843	7.98472	1.87564e-13	2.49177e-11	20.1158
GLTP	-1.05269	7.36475	7.98277	1.89738e-13	2.50352e-11	20.1046
LIF	1.68106	2.9333	-7.97377	2.00123e-13	2.61789e-11	20.0528
NPHP1	0.861024	1.22466	-7.97295	2.01106e-13	2.61789e-11	20.048
PCYT1A	-0.749075	5.38253	7.95264	2.2678e-13	2.93242e-11	19.931
PITX1	-1.65605	7.28101	7.9439	2.388e-13	3.06739e-11	19.8808
C12orf54	-1.91879	2.45971	7.929	2.60778e-13	3.32767e-11	19.7951
TMEM159	-0.849148	5.95238	7.9269	2.64032e-13	3.34716e-11	19.783
TTC22	-1.20789	4.46963	7.92107	2.73282e-13	3.44194e-11	19.7495
IQCD	1.24892	2.31005	-7.90974	2.92176e-13	3.65616e-11	19.6845
FAM83B	-1.54749	3.75344	7.90114	3.07391e-13	3.81461e-11	19.6351
RAB7B	-1.5991	4.41388	7.90038	3.08772e-13	3.81461e-11	19.6307
C2orf50	1.28065	0.870038	-7.89879	3.1168e-13	3.82617e-11	19.6216
SLC34A2	3.10654	3.02937	-7.89326	3.21992e-13	3.92789e-11	19.5899
KRT13	-4.38704	8.01635	7.88816	3.31815e-13	4.00761e-11	19.5607
PLEKHB1	1.69659	2.17659	-7.88773	3.32659e-13	4.00761e-11	19.5582
NAT14	1.19507	4.83921	-7.87922	3.49758e-13	4.1876e-11	19.5094
MFSD6L	1.53583	1.29662	-7.87339	3.6199e-13	4.30746e-11	19.476
SDR9C7	-1.92851	1.73339	7.87046	3.68274e-13	4.35551e-11	19.4592
SDC1	-1.19866	9.74502	7.86554	3.79097e-13	4.45635e-11	19.431
TCAF2	-0.816476	2.0417	7.8626	3.85716e-13	4.50683e-11	19.4142
CHRNB4	-1.21675	1.52158	7.85474	4.03968e-13	4.69183e-11	19.3692
HAS3	-2.23143	4.69427	7.84524	4.27169e-13	4.93177e-11	19.3148
ASB2	-1.29517	2.86432	7.84282	4.33308e-13	4.97304e-11	19.301
JAG1	-1.21145	5.88837	7.83476	4.5431e-13	5.15848e-11	19.2549
RHOBTB2	1.10502	3.39565	-7.83458	4.54785e-13	5.15848e-11	19.2539
C9orf152	2.16237	2.08541	-7.8333	4.5823e-13	5.1624e-11	19.2466
PLEKHS1	2.53226	2.36644	-7.83247	4.60454e-13	5.1624e-11	19.2418
PRR36	1.82321	1.93159	-7.8214	4.91387e-13	5.4474e-11	19.1786
FRMD6	-1.48496	4.54356	7.82137	4.91491e-13	5.4474e-11	19.1784
PLD1	-1.10146	3.63392	7.81523	5.09497e-13	5.61489e-11	19.1434
ASPG	-1.44768	1.91448	7.81003	5.25301e-13	5.75635e-11	19.1136
TOX3	1.8671	1.08092	-7.79353	5.78667e-13	6.30214e-11	19.0195
KRT14	-4.84177	8.08986	7.79266	5.81606e-13	6.30214e-11	19.0146
CCDC114	1.76565	1.73155	-7.78924	5.9338e-13	6.394e-11	18.9951
SRRM3	-1.39133	2.65335	7.7799	6.26758e-13	6.71635e-11	18.9418
CABLES1	1.21247	2.8774	-7.7726	6.54126e-13	6.93302e-11	18.9003
TMC5	2.27734	3.35836	-7.77149	6.58391e-13	6.9403e-11	18.8939
DCDC2	1.60245	1.00534	-7.7431	7.77292e-13	8.14939e-11	18.7324
KLHDC9	1.29972	2.52153	-7.73954	7.93653e-13	8.27618e-11	18.7122
KIF9	0.948786	2.0934	-7.7358	8.11168e-13	8.40538e-11	18.6909
C9orf116	1.16375	2.66788	-7.73506	8.1471e-13	8.40538e-11	18.6867
FOLR1	2.5594	2.46818	-7.73164	8.31138e-13	8.5295e-11	18.6673
ZMYND10	1.72844	1.81128	-7.73073	8.35578e-13	8.52993e-11	18.6621
OVOL1	-1.42019	4.27449	7.72827	8.4766e-13	8.60797e-11	18.6481
STARD5	-1.12437	2.45267	7.72625	8.57705e-13	8.66461e-11	18.6367
HR	-1.50893	4.56257	7.71125	9.36171e-13	9.40828e-11	18.5515
DUSP7	-1.35714	5.65674	7.69884	1.00643e-12	1.00622e-10	18.4812
LANCL3	-0.707933	0.944665	7.68954	1.06243e-12	1.05677e-10	18.4285
TM4SF19	-1.38456	1.56737	7.67797	1.13646e-12	1.12463e-10	18.363
RSPH1	1.50544	1.89748	-7.66971	1.19246e-12	1.17406e-10	18.3162
CLDN9	1.8938	1.91064	-7.66334	1.23747e-12	1.21223e-10	18.2802
ADGRF4	-1.90294	3.67513	7.65937	1.26638e-12	1.2343e-10	18.2577
CYP7B1	-1.36886	2.10658	7.63905	1.42505e-12	1.38201e-10	18.1429
EPCAM	1.92255	7.40684	-7.63596	1.45086e-12	1.40005e-10	18.1254
ARHGEF38	1.19575	0.932693	-7.63071	1.49575e-12	1.43621e-10	18.0958
GSDMC	-1.92355	4.41514	7.62805	1.51904e-12	1.4514e-10	18.0808
RCN1	0.738038	5.71152	-7.62031	1.58878e-12	1.51059e-10	18.0371
GAL3ST4	-0.991354	3.73257	7.61589	1.63008e-12	1.54229e-10	18.0122
LGALS7B	-3.27021	6.0946	7.6012	1.77493e-12	1.66379e-10	17.9294
TMCC3	-1.22081	3.54592	7.60113	1.77565e-12	1.66379e-10	17.929
CLEC2B	-1.91958	5.62153	7.5906	1.88734e-12	1.75995e-10	17.8697
QPCTL	0.677266	4.44793	-7.58574	1.94121e-12	1.80152e-10	17.8423
TMPRSS11F	-1.77296	1.52635	7.56987	2.12794e-12	1.96541e-10	17.753
AQP5	3.43429	4.01142	-7.56747	2.15762e-12	1.98338e-10	17.7396
TRIM15	1.68161	1.5367	-7.56035	2.24822e-12	2.05615e-10	17.6996
SLC16A3	1.03339	5.86547	-7.5596	2.25799e-12	2.05615e-10	17.6954
SPRR2E	-3.64676	4.30468	7.54496	2.45728e-12	2.22717e-10	17.6131
ARMC3	1.37038	0.73701	-7.54	2.52868e-12	2.28058e-10	17.5853
BTBD11	-1.46721	2.93915	7.53924	2.53973e-12	2.28058e-10	17.5811
WFDC2	3.2373	7.86618	-7.51422	2.93403e-12	2.6225e-10	17.4408
PGLYRP4	-1.57198	2.22761	7.50529	3.08896e-12	2.74833e-10	17.3907
CCDC40	1.15077	1.23424	-7.47744	3.62588e-12	3.2113e-10	17.235
TXNRD2	0.612065	3.66908	-7.47576	3.6609e-12	3.22758e-10	17.2256
PLIN5	1.09052	1.24899	-7.47024	3.77888e-12	3.31088e-10	17.1948
DSG1	-1.8272	1.44086	7.46976	3.78952e-12	3.31088e-10	17.1921
NKAIN4	1.62489	1.2233	-7.46717	3.84613e-12	3.34527e-10	17.1776
FAM47E	0.615448	0.50404	-7.46251	3.95061e-12	3.4208e-10	17.1516
CTNNBIP1	-0.694377	6.2941	7.45955	4.01828e-12	3.46394e-10	17.1351
ST3GAL4	1.11358	4.14583	-7.45668	4.085e-12	3.50587e-10	17.1191
CAMK2N1	1.8776	5.10082	-7.45322	4.16693e-12	3.55714e-10	17.0998
CTNNAL1	1.44088	4.62577	-7.45262	4.18141e-12	3.55714e-10	17.0964
VASN	1.28789	4.84389	-7.44474	4.37488e-12	3.70546e-10	17.0525
SLC9A3R2	1.17278	5.53329	-7.43894	4.52285e-12	3.80654e-10	17.0201
PRICKLE3	-0.812335	4.5473	7.43279	4.68503e-12	3.91684e-10	16.9859
SERPINB5	-2.38671	6.84908	7.42812	4.81228e-12	4.00597e-10	16.9598
S100A9	-2.93648	12.2557	7.42304	4.95426e-12	4.10653e-10	16.9316
CYSTM1	1.22551	5.92567	-7.42198	4.98446e-12	4.11398e-10	16.9257
MAK	1.02676	1.05444	-7.41723	5.12205e-12	4.20963e-10	16.8992
ZBTB10	1.15363	2.33144	-7.412	5.27765e-12	4.29799e-10	16.8701
ITPK1	0.682381	5.45821	-7.4118	5.28365e-12	4.29799e-10	16.869
GALNT6	1.34196	4.1964	-7.41139	5.29604e-12	4.29799e-10	16.8668
IFI16	-1.41584	7.52628	7.40484	5.49848e-12	4.42525e-10	16.8303
C2orf15	0.95278	2.59777	-7.40276	5.56417e-12	4.45961e-10	16.8188
KRT8	2.17528	8.98947	-7.39794	5.72002e-12	4.56566e-10	16.7919
DNAJC12	1.62802	1.95773	-7.39523	5.80929e-12	4.61791e-10	16.7769
FARP1	1.09601	2.26839	-7.37964	6.35072e-12	5.00726e-10	16.6903
LTB4R	-1.19993	5.02346	7.37891	6.37703e-12	5.00764e-10	16.6863
CEBPA	-1.32441	4.68614	7.37643	6.46824e-12	5.05879e-10	16.6725
PROM1	2.38854	1.78289	-7.3746	6.53611e-12	5.09134e-10	16.6623
BNIPL	-2.03943	3.75527	7.37267	6.60861e-12	5.12722e-10	16.6516
TP53AIP1	-1.60818	1.79908	7.3709	6.67563e-12	5.15859e-10	16.6418
FRMD5	0.955935	1.20612	-7.35969	7.11659e-12	5.47751e-10	16.5797
ERFE	1.54482	2.04732	-7.35263	7.40913e-12	5.68014e-10	16.5405
MAPK8IP1	1.40024	3.15176	-7.34863	7.5802e-12	5.77003e-10	16.5183
SPEF1	1.20158	1.10944	-7.34849	7.58588e-12	5.77003e-10	16.5176
GAL3ST1	1.23562	0.740285	-7.32907	8.47366e-12	6.42012e-10	16.4101
SNX31	-1.34764	1.0486	7.32478	8.68304e-12	6.55316e-10	16.3864
COBL	1.54831	1.9532	-7.32245	8.7988e-12	6.61479e-10	16.3735
MAP3K6	-0.871697	5.98023	7.31484	9.18817e-12	6.88084e-10	16.3315
RHCG	-3.49103	5.84858	7.30637	9.64155e-12	7.16504e-10	16.2847
MYADM	1.70353	5.77773	-7.29866	1.00737e-11	7.42447e-10	16.2421
PTOV1	0.610735	6.32128	-7.29778	1.01237e-11	7.42447e-10	16.2373
SOX15	-2.21337	5.51303	7.29764	1.01322e-11	7.42447e-10	16.2364
ME3	1.20777	2.81691	-7.29728	1.01526e-11	7.42447e-10	16.2345
CRYBG2	-1.38362	4.60427	7.29677	1.0182e-11	7.42447e-10	16.2317
RASSF5	-1.00447	4.52918	7.29359	1.03675e-11	7.50739e-10	16.2141
CUTA	0.641928	7.81783	-7.2935	1.03732e-11	7.50739e-10	16.2136
C5orf49	1.69326	1.14715	-7.29225	1.0447e-11	7.53274e-10	16.2067
MAF	-1.30305	4.48068	7.28567	1.08446e-11	7.79046e-10	16.1704
C11orf49	0.737591	3.74363	-7.28483	1.08965e-11	7.79882e-10	16.1658
CENPV	1.44323	3.62381	-7.28356	1.09756e-11	7.82656e-10	16.1588
SEL1L3	1.23212	4.99636	-7.27697	1.13934e-11	8.09473e-10	16.1225
CCDC173	1.03021	0.931413	-7.27154	1.17499e-11	8.31758e-10	16.0926
CCDC151	0.978011	1.04936	-7.26081	1.24868e-11	8.80703e-10	16.0335
TMEM125	1.55073	4.57023	-7.25918	1.26025e-11	8.85643e-10	16.0245
S1PR5	-1.74761	4.57527	7.24785	1.34379e-11	9.40328e-10	15.9622
RAPGEFL1	-1.50641	5.99254	7.24684	1.35149e-11	9.40328e-10	15.9566
MICALL1	-1.02672	6.02658	7.2467	1.35261e-11	9.40328e-10	15.9558
SESN3	-1.23012	3.52974	7.24042	1.4015e-11	9.70837e-10	15.9214
FBXO27	-1.58975	4.21303	7.23808	1.42018e-11	9.80279e-10	15.9085
MFSD10	0.662347	6.5426	-7.23557	1.44047e-11	9.9076e-10	15.8947
MMP15	1.11753	5.113	-7.23027	1.48434e-11	1.01621e-09	15.8656
ACY3	1.72497	2.8314	-7.22984	1.48796e-11	1.01621e-09	15.8632
PTPRZ1	-1.8963	2.72369	7.22455	1.53315e-11	1.0434e-09	15.8342
COBLL1	-0.92172	3.40456	7.21508	1.61738e-11	1.09688e-09	15.7822
CFAP45	1.55903	2.28968	-7.21437	1.62395e-11	1.0975e-09	15.7783
DRC1	1.5355	0.999317	-7.21281	1.63826e-11	1.10333e-09	15.7698
NEK5	0.76657	0.734255	-7.20946	1.66962e-11	1.12055e-09	15.7514
SLC6A20	1.53416	0.940007	-7.20782	1.68508e-11	1.12703e-09	15.7424
PRKCH	-0.752495	3.92954	7.20687	1.69415e-11	1.1292e-09	15.7372
GMDS	1.07491	4.9068	-7.2053	1.70927e-11	1.13538e-09	15.7286
SLC39A2	-1.93372	2.84653	7.20239	1.7376e-11	1.15025e-09	15.7126
RAPGEF5	-0.881193	3.13403	7.19919	1.76924e-11	1.16722e-09	15.6951
FERMT1	-1.34253	4.77659	7.19815	1.7796e-11	1.17007e-09	15.6894
LPAR5	-0.992609	3.82836	7.19096	1.85329e-11	1.2144e-09	15.65
HCAR2	-2.05858	4.40943	7.18875	1.87652e-11	1.22549e-09	15.6379
SMIM6	1.59015	1.29319	-7.18745	1.89034e-11	1.23037e-09	15.6308
IL20RB	-2.52358	6.03574	7.18456	1.92141e-11	1.24308e-09	15.615
TPRG1L	-0.631505	6.67992	7.1841	1.92638e-11	1.24308e-09	15.6125
GLRB	1.3881	1.7063	-7.18385	1.9291e-11	1.24308e-09	15.6111
SORBS2	1.41388	1.81091	-7.17765	1.99768e-11	1.27878e-09	15.5772
PRKX	-1.12382	5.12637	7.17441	2.03449e-11	1.29504e-09	15.5594
CSRP2	-1.25355	4.70593	7.17424	2.03644e-11	1.29504e-09	15.5585
KCTD1	-0.993877	4.50881	7.17342	2.04585e-11	1.29677e-09	15.554
SLC2A1	-1.3632	8.27103	7.16807	2.10843e-11	1.33209e-09	15.5248
DUSP4	1.41485	3.36527	-7.16658	2.12626e-11	1.33899e-09	15.5166
SMOC1	2.33693	2.32211	-7.16144	2.18866e-11	1.37383e-09	15.4885
SYTL1	-0.95734	5.44314	7.15992	2.20748e-11	1.38117e-09	15.4802
PRR29	1.04693	1.08878	-7.14254	2.43409e-11	1.51806e-09	15.3853
USP2	0.948984	1.76928	-7.14136	2.45022e-11	1.52322e-09	15.3789
ARHGAP23	-1.38513	5.67247	7.14079	2.45817e-11	1.52328e-09	15.3758
BAG3	-0.991299	6.99032	7.13954	2.47548e-11	1.52912e-09	15.369
CCDC57	0.746276	3.15367	-7.13751	2.50389e-11	1.5377e-09	15.3579
FAM149A	1.17052	1.59465	-7.13741	2.50522e-11	1.5377e-09	15.3574
LRRC73	0.890995	1.3012	-7.13403	2.55336e-11	1.5623e-09	15.3389
ISYNA1	1.29089	5.96867	-7.12378	2.70447e-11	1.64516e-09	15.2831
KCNJ12	1.22177	1.2169	-7.1237	2.70574e-11	1.64516e-09	15.2826
HOXD11	-1.62219	2.99665	7.12061	2.75306e-11	1.6687e-09	15.2658
GPC1	-1.05207	6.50386	7.11986	2.76466e-11	1.67051e-09	15.2617
GJB1	2.03782	1.44938	-7.11748	2.80192e-11	1.68776e-09	15.2487
AGR3	2.86853	2.50711	-7.11172	2.89386e-11	1.73775e-09	15.2174
CAMSAP1	-0.776135	4.62135	7.10766	2.96053e-11	1.7723e-09	15.1953
SYT12	1.31247	1.50451	-7.10497	3.00552e-11	1.7937e-09	15.1806
RASGRP1	-1.0637	2.53027	7.10376	3.02595e-11	1.80035e-09	15.1741
KLRG2	-1.39776	2.83099	7.10299	3.03908e-11	1.80263e-09	15.1699
LPAR3	-1.66884	3.79429	7.10103	3.07259e-11	1.81562e-09	15.1592
SBSN	-3.26058	4.0612	7.10062	3.0797e-11	1.81562e-09	15.157
DNAJC22	1.65524	2.11245	-7.09837	3.11873e-11	1.82776e-09	15.1447
HOXB9	2.14424	3.34718	-7.09835	3.11915e-11	1.82776e-09	15.1446
CSTB	-1.13263	9.56948	7.09177	3.23616e-11	1.89062e-09	15.1089
ANXA8	-2.12671	4.64436	7.08672	3.3289e-11	1.93896e-09	15.0814
ICA1	1.52858	3.37304	-7.0748	3.55866e-11	2.06658e-09	15.0167
GCSAM	-0.794611	2.11617	7.07248	3.60509e-11	2.08729e-09	15.0041
ABCC5	-1.25092	4.8954	7.06934	3.66895e-11	2.11794e-09	14.987
NFE2	1.08886	1.27811	-7.06706	3.7159e-11	2.13868e-09	14.9747
ACTBL2	0.652723	0.442597	-7.06597	3.73868e-11	2.14542e-09	14.9688
SRI	0.678994	6.0253	-7.05876	3.89243e-11	2.22707e-09	14.9297
TSPAN8	2.47863	1.96123	-7.05255	4.02981e-11	2.29889e-09	14.896
MMEL1	1.1177	1.19547	-7.03663	4.40415e-11	2.50507e-09	14.8098
GRB14	1.3139	1.64306	-7.03306	4.49274e-11	2.54799e-09	14.7905
OXTR	0.883249	1.38655	-7.02028	4.82438e-11	2.72809e-09	14.7214
HIVEP3	-0.818525	2.2561	7.01599	4.9411e-11	2.78152e-09	14.6982
MLPH	1.84158	3.72385	-7.01535	4.9586e-11	2.78152e-09	14.6947
MUC16	1.83112	2.57422	-7.01523	4.96187e-11	2.78152e-09	14.6941
DNAJC6	0.789002	0.905128	-7.01384	5.00062e-11	2.79516e-09	14.6866
TMEM139	1.85193	2.19903	-7.01225	5.0449e-11	2.80375e-09	14.678
PIFO	1.552	1.24726	-7.00726	5.187e-11	2.87449e-09	14.651
BCL2L10	-1.54125	3.40591	7.00522	5.24614e-11	2.89898e-09	14.64
TIMP1	1.26184	8.55445	-7.00034	5.39057e-11	2.97032e-09	14.6137
PRSS27	-1.58545	2.79962	6.99731	5.48238e-11	3.01236e-09	14.5973
FREM2	1.19684	0.751185	-6.99596	5.52365e-11	3.02646e-09	14.59
ZNF579	0.789415	3.91643	-6.98652	5.82107e-11	3.18044e-09	14.5391
ANKRD10	0.831551	5.84576	-6.98314	5.93142e-11	3.23162e-09	14.5209
SPATA17	0.947024	1.0943	-6.98192	5.97186e-11	3.24454e-09	14.5143
TIAM1	-1.04518	3.91162	6.97774	6.11194e-11	3.31137e-09	14.4918
NME4	1.125	5.20711	-6.97459	6.21983e-11	3.36044e-09	14.4749
SLFN11	1.21759	4.3873	-6.97333	6.26347e-11	3.37462e-09	14.4681
PODXL	1.1694	4.67356	-6.96264	6.64619e-11	3.5577e-09	14.4105
FBXL2	0.789027	1.48056	-6.96232	6.65831e-11	3.5577e-09	14.4088
DEF6	-0.646585	5.95212	6.95714	6.85219e-11	3.6417e-09	14.3809
KCTD14	1.34271	2.81007	-6.95712	6.85307e-11	3.6417e-09	14.3808
NMNAT3	-1.17119	3.31708	6.9498	7.13683e-11	3.75578e-09	14.3415
C1orf194	1.63365	1.16775	-6.94957	7.14565e-11	3.75578e-09	14.3403
FOXA2	1.68408	1.01985	-6.94947	7.14971e-11	3.75578e-09	14.3397
NECTIN4	-1.17097	7.14121	6.9491	7.16456e-11	3.75578e-09	14.3377
LCN12	1.06023	1.35524	-6.94763	7.22287e-11	3.77614e-09	14.3298
AL162231.1	0.59737	1.19432	-6.94108	7.48982e-11	3.90518e-09	14.2946
DNASE1L3	-1.35481	1.70767	6.93809	7.615e-11	3.9598e-09	14.2785
CAPN8	1.91843	1.84092	-6.93278	7.84219e-11	4.06356e-09	14.25
PLCH2	-1.48831	3.63375	6.93245	7.85643e-11	4.06356e-09	14.2483
HGD	1.97729	1.4593	-6.92988	7.9691e-11	4.10179e-09	14.2345
C4BPB	1.78533	1.08728	-6.9298	7.97265e-11	4.10179e-09	14.234
KLHDC7A	1.6022	1.48748	-6.9283	8.03886e-11	4.12491e-09	14.226
ARHGAP29	1.09642	2.03082	-6.92511	8.18202e-11	4.18729e-09	14.2089
LZTS3	1.35465	3.92992	-6.924	8.23219e-11	4.20188e-09	14.203
OSBPL10	0.910045	3.04266	-6.91763	8.52733e-11	4.3411e-09	14.1688
TOLLIP	-0.604356	5.36625	6.91677	8.56796e-11	4.35037e-09	14.1642
TFF1	2.36846	2.08129	-6.91378	8.71096e-11	4.41143e-09	14.1481
DIPK2A	-1.02981	4.59183	6.91227	8.78397e-11	4.42894e-09	14.14
CDC42EP2	0.825494	4.6022	-6.91212	8.7912e-11	4.42894e-09	14.1392
SNAI2	-1.58601	5.03546	6.90933	8.92791e-11	4.48616e-09	14.1243
IL1RN	-1.72828	6.44724	6.90725	9.03104e-11	4.52236e-09	14.1131
STX11	-1.08261	3.01514	6.90693	9.04659e-11	4.52236e-09	14.1115
HOPX	-1.16206	3.0776	6.89736	9.53745e-11	4.74329e-09	14.0602
CASC1	1.04072	0.980336	-6.89527	9.64824e-11	4.78612e-09	14.049
APOBEC3C	-0.745698	6.45788	6.8879	1.00488e-10	4.97184e-09	14.0096
TSPAN4	0.933717	3.9479	-6.88745	1.00739e-10	4.97184e-09	14.0071
TLCD5	0.812607	2.01624	-6.87458	1.08143e-10	5.32373e-09	13.9384
APOBEC3A	-2.09515	3.56255	6.87085	1.10389e-10	5.42053e-09	13.9184
RHOV	-1.60947	7.55877	6.86931	1.11327e-10	5.45275e-09	13.9102
GLOD5	0.78708	0.879562	-6.86462	1.14238e-10	5.58125e-09	13.8852
ATAD3C	1.11346	2.20592	-6.85758	1.18755e-10	5.78738e-09	13.8476
KRT33A	-0.964014	0.828541	6.85666	1.19357e-10	5.80213e-09	13.8427
GDPD5	0.794493	2.20326	-6.8554	1.20185e-10	5.82776e-09	13.836
SMYD3	0.697779	2.11282	-6.85451	1.20779e-10	5.84197e-09	13.8312
CDR2L	1.16746	5.03817	-6.85053	1.23451e-10	5.95634e-09	13.81
PLAAT3	1.51689	3.85101	-6.84657	1.26165e-10	6.07218e-09	13.7889
LCE1C	-1.22235	1.07497	6.83973	1.31e-10	6.27377e-09	13.7524
TTC25	1.18428	1.25312	-6.82531	1.41794e-10	6.77398e-09	13.6757
RARG	-0.769519	6.40154	6.82248	1.44015e-10	6.86319e-09	13.6606
AQP6	0.846167	0.706401	-6.81374	1.51083e-10	7.18234e-09	13.6142
NOTCH1	-0.983378	5.21048	6.81025	1.53999e-10	7.3031e-09	13.5956
GPR157	-1.09086	4.42096	6.80934	1.54772e-10	7.32183e-09	13.5908
FAM135A	-0.923765	3.16511	6.80335	1.59941e-10	7.54795e-09	13.5589
TMEM8A	0.786268	5.73909	-6.80208	1.61058e-10	7.56019e-09	13.5522
SOX7	-1.57859	4.11368	6.80206	1.61076e-10	7.56019e-09	13.5521
ZNF844	1.10813	1.77594	-6.79395	1.68391e-10	7.87014e-09	13.509
ZNF444	0.621091	4.06175	-6.78986	1.72201e-10	8.02887e-09	13.4873
FRRS1	-1.24207	3.18013	6.76801	1.94049e-10	9.02585e-09	13.3716
TMEM263	0.838323	4.67168	-6.76667	1.95477e-10	9.0705e-09	13.3645
SLC7A2	1.90449	2.44014	-6.75818	2.04754e-10	9.47831e-09	13.3195
CLCNKB	0.596947	0.54937	-6.75727	2.05774e-10	9.50284e-09	13.3147
TPD52L1	-1.04644	4.52644	6.74197	2.23688e-10	1.02755e-08	13.2338
FUT4	0.993334	2.38406	-6.74164	2.24094e-10	1.02755e-08	13.232
STARD10	0.929169	5.8565	-6.74055	2.25423e-10	1.03121e-08	13.2263
ENPP5	1.60448	2.28642	-6.73135	2.37008e-10	1.08165e-08	13.1777
FAM126A	-0.971444	2.54095	6.73015	2.38566e-10	1.08621e-08	13.1714
ARHGAP25	-0.801905	3.00944	6.72639	2.43501e-10	1.10608e-08	13.1516
PLCH1	1.33191	1.18164	-6.71969	2.5255e-10	1.1445e-08	13.1162
FOXJ1	2.66315	3.92875	-6.71728	2.55887e-10	1.15692e-08	13.1035
STEAP1B	-1.35916	2.25833	6.71165	2.6384e-10	1.18734e-08	13.0738
FUZ	0.901637	4.30522	-6.70884	2.67903e-10	1.20284e-08	13.059
MAP1S	0.674517	4.67903	-6.70729	2.70162e-10	1.20739e-08	13.0509
WFDC5	-1.95786	2.43184	6.70613	2.71872e-10	1.21154e-08	13.0448
LAD1	-0.963005	8.3991	6.70582	2.7234e-10	1.21154e-08	13.0431
ARHGAP30	-0.892109	4.26385	6.70339	2.7595e-10	1.22479e-08	13.0303
KRT78	-1.79536	2.4395	6.69957	2.81752e-10	1.24769e-08	13.0102
NDUFA4L2	-2.19135	5.73086	6.69547	2.88087e-10	1.27283e-08	12.9886
DNAAF3	1.14643	2.0817	-6.69036	2.96199e-10	1.3057e-08	12.9617
HOXD10	-1.37884	3.8782	6.68784	3.00269e-10	1.32064e-08	12.9485
BMPR1B	1.32813	1.68255	-6.68044	3.12577e-10	1.37081e-08	12.9096
DENND2A	1.03733	1.68318	-6.68014	3.13091e-10	1.37081e-08	12.908
SLC39A10	0.842398	3.61569	-6.67536	3.21311e-10	1.40291e-08	12.8829
FAM167A	1.44791	2.02751	-6.67504	3.21868e-10	1.40291e-08	12.8812
DAPK1	1.34542	3.2393	-6.66641	3.37274e-10	1.46676e-08	12.8359
ZNF185	-1.14337	6.76142	6.66513	3.39619e-10	1.47366e-08	12.8292
FN3K	1.07047	3.56099	-6.66155	3.46285e-10	1.49923e-08	12.8104
EPHB3	-1.39281	5.48927	6.66023	3.48761e-10	1.50658e-08	12.8035
GABRQ	-1.70894	2.30554	6.6509	3.66824e-10	1.57759e-08	12.7546
INHBB	1.56266	2.58284	-6.64908	3.70467e-10	1.58973e-08	12.745
PGD	-0.765022	8.33848	6.63679	3.95915e-10	1.69518e-08	12.6806
DAW1	0.830643	0.440397	-6.63451	4.00817e-10	1.71239e-08	12.6687
SAMD9	-1.31845	4.89248	6.63342	4.0319e-10	1.71874e-08	12.663
MXD1	-1.17527	4.99145	6.62358	4.25196e-10	1.80857e-08	12.6115
FERMT2	1.18678	2.73351	-6.62099	4.31187e-10	1.83004e-08	12.598
ATP7B	1.50329	1.9798	-6.6198	4.33964e-10	1.83781e-08	12.5918
MALT1	-0.663664	3.83991	6.61558	4.43973e-10	1.8761e-08	12.5697
TRIM29	-1.63265	7.13743	6.61468	4.46134e-10	1.88114e-08	12.565
TMEM205	0.877782	6.92219	-6.60748	4.6378e-10	1.9513e-08	12.5274
SLC12A7	1.08623	5.1652	-6.59806	4.87949e-10	2.04412e-08	12.4782
GPR35	1.19425	1.79698	-6.59628	4.9265e-10	2.05936e-08	12.4689
GLIS3	1.10278	1.5623	-6.59202	5.04077e-10	2.1026e-08	12.4467
CXCL3	1.54539	2.54568	-6.59087	5.07211e-10	2.11113e-08	12.4407
IPPK	-0.957577	2.74467	6.5876	5.16216e-10	2.14401e-08	12.4237
ZBTB7B	-0.759185	6.26277	6.58434	5.25358e-10	2.17267e-08	12.4067
HAP1	-1.40963	2.26031	6.58147	5.33531e-10	2.20178e-08	12.3917
HLF	-1.07285	1.84487	6.57936	5.39606e-10	2.21742e-08	12.3808
TMEM38A	0.886993	3.46411	-6.57695	5.4667e-10	2.24169e-08	12.3682
LPAR6	-1.34185	4.59498	6.57625	5.48728e-10	2.24539e-08	12.3645
CFB	1.43362	3.86571	-6.57523	5.51732e-10	2.25275e-08	12.3592
DMBT1	1.75149	1.27293	-6.57486	5.5285e-10	2.25275e-08	12.3573
ANKRD1	1.08659	0.782844	-6.57141	5.63176e-10	2.29001e-08	12.3394
S100A13	0.849876	6.62531	-6.57098	5.64484e-10	2.29053e-08	12.3371
PTPN13	-1.30436	4.81364	6.56442	5.84733e-10	2.36393e-08	12.303
GRAMD1A	0.793839	4.82937	-6.56273	5.9007e-10	2.37942e-08	12.2942
FLYWCH1	-0.635736	4.38913	6.55901	6.01993e-10	2.41745e-08	12.2748
FOXE1	-1.75396	3.88642	6.5528	6.22394e-10	2.4942e-08	12.2426
DTX4	1.25325	4.24031	-6.54985	6.32301e-10	2.52868e-08	12.2273
NOL4L	1.09091	2.77366	-6.54832	6.37545e-10	2.54358e-08	12.2193
DDAH2	0.981309	6.33344	-6.54799	6.38648e-10	2.54358e-08	12.2176
SPA17	0.810804	2.36081	-6.54621	6.44791e-10	2.56278e-08	12.2083
PRR26	0.708555	0.440305	-6.54581	6.4617e-10	2.56301e-08	12.2063
INPPL1	0.672466	5.55283	-6.54418	6.51827e-10	2.58017e-08	12.1978
ATP11B	-0.955749	5.10692	6.53944	6.68618e-10	2.64124e-08	12.1732
SDSL	0.880034	4.18973	-6.53587	6.81542e-10	2.6814e-08	12.1547
RGMA	-1.19632	2.75752	6.53587	6.81548e-10	2.6814e-08	12.1547
PGM2	-0.895703	5.86036	6.53539	6.83281e-10	2.68278e-08	12.1522
KCNH3	1.20911	1.33021	-6.52995	7.03482e-10	2.75651e-08	12.124
ABCC3	1.51953	3.51685	-6.52345	7.28421e-10	2.84176e-08	12.0903
ZNF436	-0.76745	4.48628	6.52276	7.31098e-10	2.84176e-08	12.0867
RORA	-0.800256	1.93196	6.51735	7.52606e-10	2.91208e-08	12.0586
ZBED3	1.02419	2.56906	-6.51673	7.55079e-10	2.91208e-08	12.0555
NCMAP	1.23933	1.12249	-6.5167	7.55194e-10	2.91208e-08	12.0553
TESK2	-0.777241	3.732	6.51129	7.77368e-10	2.99163e-08	12.0273
NHLH2	-0.82175	0.774111	6.51023	7.81797e-10	2.99897e-08	12.0218
PRRG4	-0.951148	5.77676	6.50852	7.88995e-10	3.01841e-08	12.0129
ZNF662	1.09998	1.64392	-6.50274	8.13741e-10	3.10695e-08	11.983
EPS8L3	1.83266	1.13844	-6.50128	8.20097e-10	3.12507e-08	11.9755
CAPN14	-1.70008	1.83616	6.50059	8.23152e-10	3.13056e-08	11.9719
PRRT1	0.684552	1.87775	-6.48708	8.84717e-10	3.35156e-08	11.9021
EMP1	-1.33972	6.15683	6.48444	8.97282e-10	3.39253e-08	11.8885
RFK	0.874468	4.51105	-6.48083	9.14718e-10	3.45173e-08	11.8698
MUC5B	2.46116	1.90398	-6.47787	9.29265e-10	3.49303e-08	11.8546
ABHD14A	0.651469	3.68131	-6.47622	9.37453e-10	3.51176e-08	11.8461
ECM1	-1.64811	5.64297	6.47614	9.3787e-10	3.51176e-08	11.8456
ROPN1L	0.888487	0.704198	-6.4711	9.63385e-10	3.59544e-08	11.8197
MUC13	2.63316	2.19409	-6.471	9.63924e-10	3.59544e-08	11.8191
PARD3	-0.693164	5.42255	6.45879	1.0287e-09	3.82967e-08	11.7562
SLC37A2	-1.16863	3.29433	6.458	1.033e-09	3.83833e-08	11.7522
SLC19A1	0.693237	2.62255	-6.45746	1.03601e-09	3.84216e-08	11.7493
TTC21A	0.672148	1.48914	-6.45401	1.05519e-09	3.9058e-08	11.7316
SLC20A2	-0.799466	5.2604	6.45357	1.05767e-09	3.90754e-08	11.7293
SERPINB8	-0.847004	4.22209	6.45169	1.06831e-09	3.93934e-08	11.7196
UNC5A	1.04406	0.798022	-6.44483	1.10799e-09	4.0779e-08	11.6843
LRP1	-1.01257	5.39933	6.44327	1.1172e-09	4.10401e-08	11.6763
USH1G	-1.24187	1.83526	6.44032	1.1349e-09	4.15329e-08	11.6611
GJB2	-2.03647	6.97699	6.43934	1.14082e-09	4.16711e-08	11.6561
ZNF620	0.769792	2.11935	-6.43453	1.1703e-09	4.26676e-08	11.6314
ERBB4	0.821742	0.54347	-6.432	1.18614e-09	4.31638e-08	11.6184
CD9	-0.8721	9.19287	6.42926	1.20356e-09	4.37159e-08	11.6043
TRIM10	0.783595	0.590468	-6.42223	1.24929e-09	4.52077e-08	11.5682
NMNAT2	1.08531	1.30511	-6.41981	1.26546e-09	4.57075e-08	11.5558
AKR1C2	-2.16051	3.37066	6.41569	1.2934e-09	4.66296e-08	11.5346
BCL11A	-1.13498	3.32543	6.41317	1.31081e-09	4.71697e-08	11.5217
SMIM31	1.11482	0.667533	-6.4046	1.37172e-09	4.92702e-08	11.4778
GRAMD1B	1.16876	1.55041	-6.40093	1.3986e-09	5.00561e-08	11.459
SLC22A4	0.798243	1.92758	-6.40091	1.39876e-09	5.00561e-08	11.4589
ADAD2	-0.6331	0.798978	6.40027	1.40354e-09	5.01347e-08	11.4556
TRERF1	-0.906215	3.65337	6.39828	1.41835e-09	5.05704e-08	11.4454
CAPSL	1.29315	0.747662	-6.3976	1.42353e-09	5.06515e-08	11.4419
FCGRT	0.856805	6.15399	-6.39729	1.42585e-09	5.06515e-08	11.4403
FBLN5	1.07153	3.54106	-6.38884	1.49103e-09	5.26777e-08	11.3971
RELCH	-0.721127	4.33057	6.38743	1.50223e-09	5.29769e-08	11.3898
SULT1A2	0.868698	1.1521	-6.38594	1.51412e-09	5.32993e-08	11.3822
CP	2.31258	3.15916	-6.38557	1.51705e-09	5.33058e-08	11.3803
SRMS	1.19419	1.66964	-6.38467	1.52429e-09	5.34632e-08	11.3757
FAM81B	1.27134	0.752258	-6.38238	1.54285e-09	5.40164e-08	11.364
RHPN1	1.12297	4.4336	-6.38129	1.55173e-09	5.42295e-08	11.3585
PNMA2	1.12951	0.851197	-6.38001	1.56227e-09	5.44764e-08	11.3519
KIF12	1.85028	2.0708	-6.37976	1.56441e-09	5.44764e-08	11.3506
ARHGAP44	0.918639	1.33325	-6.37471	1.60668e-09	5.58294e-08	11.3248
CFAP43	0.759916	0.730317	-6.37443	1.60902e-09	5.58294e-08	11.3234
SLC30A2	1.24778	0.836024	-6.37301	1.62115e-09	5.61498e-08	11.3162
IL12RB2	-1.31586	2.36586	6.37034	1.64421e-09	5.68468e-08	11.3025
SLC4A4	1.34117	1.04203	-6.36962	1.65048e-09	5.69622e-08	11.2988
NFIB	1.24627	3.77318	-6.3692	1.65411e-09	5.6986e-08	11.2967
PPP1R1B	2.37664	2.29398	-6.36816	1.66328e-09	5.72003e-08	11.2913
CD151	0.625306	7.72945	-6.36492	1.69191e-09	5.8082e-08	11.2748
DNAH14	0.60617	1.01143	-6.35826	1.75246e-09	6.00543e-08	11.2408
FNDC11	0.674283	0.818804	-6.35426	1.78984e-09	6.12271e-08	11.2204
CMTM8	1.20126	3.77658	-6.35016	1.82891e-09	6.24535e-08	11.1995
EPHX4	1.00594	1.26961	-6.34457	1.88362e-09	6.41989e-08	11.171
IQCE	0.754582	3.35689	-6.34426	1.88664e-09	6.41989e-08	11.1695
SLC37A4	0.642197	3.83303	-6.34385	1.89076e-09	6.42262e-08	11.1674
BCAM	1.52895	6.50775	-6.34229	1.90637e-09	6.46432e-08	11.1594
SPAG8	0.89691	1.23939	-6.33546	1.97622e-09	6.68948e-08	11.1246
SERPINA5	1.02809	0.799275	-6.33121	2.02094e-09	6.82896e-08	11.103
TFF3	2.83395	3.84108	-6.32851	2.04979e-09	6.91437e-08	11.0893
CROT	-0.80601	4.15225	6.3277	2.05851e-09	6.93173e-08	11.0852
SYPL1	-0.63096	7.6327	6.32317	2.1082e-09	7.07452e-08	11.0621
DRD2	0.803378	0.537231	-6.32175	2.12401e-09	7.11526e-08	11.0549
MSLNL	1.10193	1.13603	-6.32082	2.13443e-09	7.13242e-08	11.0502
CALML5	-3.23739	6.41211	6.32063	2.13649e-09	7.13242e-08	11.0492
XRN1	-0.690729	4.21846	6.31997	2.14397e-09	7.14508e-08	11.0458
PNPLA2	0.659048	6.08624	-6.31903	2.15462e-09	7.16827e-08	11.0411
NDRG4	-1.46065	2.5966	6.31739	2.17323e-09	7.21782e-08	11.0327
IL36G	-2.23241	2.85392	6.31186	2.23729e-09	7.40522e-08	11.0046
CATIP	0.760646	0.493734	-6.31031	2.25562e-09	7.45317e-08	10.9968
ANXA8L1	-1.57904	3.45919	6.30083	2.37073e-09	7.8096e-08	10.9486
LEXM	-0.620663	0.937559	6.30076	2.37155e-09	7.8096e-08	10.9483
GPR68	-1.3217	3.94784	6.2983	2.40239e-09	7.88695e-08	10.9358
S100A2	-2.14797	10.2293	6.29802	2.40592e-09	7.88695e-08	10.9344
IFFO2	-1.24652	4.95396	6.29651	2.42506e-09	7.9186e-08	10.9267
FBXO16	0.680333	0.626186	-6.2887	2.52646e-09	8.23582e-08	10.8871
VPS4B	-0.665938	5.95829	6.28752	2.54216e-09	8.2731e-08	10.8811
IRS2	1.13707	3.14202	-6.28155	2.62285e-09	8.52142e-08	10.8509
SERPINB2	-2.19295	3.98193	6.2781	2.67065e-09	8.6622e-08	10.8335
BIN1	0.879574	4.07257	-6.26993	2.78743e-09	9.01083e-08	10.7921
NDRG1	-1.20627	8.14313	6.25443	3.02264e-09	9.70648e-08	10.7138
STON2	-0.986764	4.12612	6.25322	3.04185e-09	9.73593e-08	10.7077
TSPAN5	-1.02709	3.69751	6.2492	3.10635e-09	9.89589e-08	10.6874
WDR54	0.896377	4.66215	-6.24916	3.10714e-09	9.89589e-08	10.6872
C7orf57	1.26271	1.12916	-6.24793	3.12717e-09	9.94337e-08	10.681
CXCL2	1.68067	3.81561	-6.24744	3.13507e-09	9.95218e-08	10.6785
PRIMA1	-1.42831	2.94893	6.24454	3.18287e-09	1.00782e-07	10.6639
CD55	1.37389	6.74393	-6.24441	3.18516e-09	1.00782e-07	10.6632
EPHA1	-0.732869	4.80349	6.24348	3.20064e-09	1.01107e-07	10.6585
PITX2	-1.31895	1.71913	6.24259	3.21553e-09	1.01315e-07	10.654
CLPSL2	0.808122	0.66753	-6.24246	3.21767e-09	1.01315e-07	10.6534
C11orf74	0.702087	4.23487	-6.23883	3.27919e-09	1.03085e-07	10.6351
CFAP221	0.722931	0.4054	-6.23397	3.36342e-09	1.05221e-07	10.6106
RGS12	-0.672999	4.15399	6.23026	3.42908e-09	1.0676e-07	10.5919
DNAJB1	-0.601402	7.87877	6.23026	3.42913e-09	1.0676e-07	10.5919
KRT31	-1.67143	1.6346	6.22847	3.46119e-09	1.07585e-07	10.5829
KRT7	2.68356	7.9704	-6.22735	3.48143e-09	1.08041e-07	10.5772
CPAMD8	1.21757	1.72679	-6.22523	3.52024e-09	1.08897e-07	10.5665
DNAI1	0.805034	0.484972	-6.22192	3.58142e-09	1.104e-07	10.5499
AKAP12	1.38251	2.41564	-6.22168	3.5859e-09	1.104e-07	10.5487
MFN2	-0.657931	6.97433	6.21567	3.69984e-09	1.13728e-07	10.5184
PLEKHN1	-1.12372	3.46947	6.21289	3.75387e-09	1.15206e-07	10.5044
IRF6	-1.04794	7.70906	6.20976	3.81542e-09	1.1691e-07	10.4887
CAPS	1.56045	4.3004	-6.20801	3.85037e-09	1.17609e-07	10.4799
CFAP77	1.02227	0.630856	-6.20646	3.88163e-09	1.18192e-07	10.4721
TACSTD2	-1.17041	10.473	6.20174	3.9781e-09	1.20939e-07	10.4484
TSGA10	0.59911	1.51864	-6.19815	4.0529e-09	1.2302e-07	10.4304
GOLT1A	1.47627	3.07857	-6.19035	4.22054e-09	1.27851e-07	10.3912
CTXN1	1.33771	4.13849	-6.19014	4.22522e-09	1.27851e-07	10.3902
NEK6	0.824389	4.34795	-6.18153	4.41837e-09	1.3328e-07	10.347
CD44	-0.867333	7.27982	6.18028	4.44701e-09	1.33935e-07	10.3407
FMO4	-1.0185	3.132	6.17986	4.45683e-09	1.34023e-07	10.3386
SPECC1	0.794334	3.44361	-6.17566	4.55496e-09	1.36762e-07	10.3176
TPRG1	-0.861051	1.59281	6.17469	4.57784e-09	1.37236e-07	10.3127
CCNO	1.0277	4.10012	-6.17388	4.59704e-09	1.37599e-07	10.3087
GRHL1	-1.15065	4.61159	6.17228	4.63549e-09	1.38391e-07	10.3006
TCTN1	0.648795	2.96363	-6.17218	4.63775e-09	1.38391e-07	10.3002
DENND5B	0.688955	1.3965	-6.17062	4.67548e-09	1.39302e-07	10.2923
ARHGEF19	-0.750377	5.67441	6.16898	4.71535e-09	1.40275e-07	10.2841
CLCF1	1.05475	3.76143	-6.16444	4.82767e-09	1.43396e-07	10.2614
LARP6	0.983865	2.87027	-6.16368	4.84673e-09	1.43742e-07	10.2576
HABP2	1.38309	0.927462	-6.1574	5.007e-09	1.48268e-07	10.2262
ACSM3	0.93574	1.2697	-6.15698	5.01779e-09	1.48361e-07	10.2241
MCC	-1.07088	3.39534	6.15174	5.1558e-09	1.5221e-07	10.1979
SRD5A1	-0.812251	4.23148	6.14796	5.25758e-09	1.54979e-07	10.179
PDGFC	1.25898	3.2516	-6.14473	5.34608e-09	1.57348e-07	10.1629
GRAMD4	-0.686307	5.30795	6.14375	5.37327e-09	1.57909e-07	10.158
LRP5	0.814556	5.44238	-6.14059	5.46165e-09	1.60263e-07	10.1422
ENO3	0.710071	2.42983	-6.13502	5.62138e-09	1.64701e-07	10.1144
DOC2B	-1.42127	3.71159	6.13163	5.72063e-09	1.67357e-07	10.0975
CRIM1	1.06833	4.64807	-6.13127	5.73112e-09	1.67411e-07	10.0957
PGPEP1	0.890512	3.41032	-6.1269	5.86201e-09	1.7072e-07	10.0739
ASPHD1	1.27575	2.94269	-6.12579	5.89562e-09	1.71185e-07	10.0684
SPATA6L	0.689697	1.35468	-6.12253	5.99554e-09	1.73826e-07	10.0521
OCEL1	0.635372	4.67098	-6.1206	6.05569e-09	1.75046e-07	10.0425
ARAP2	-0.714341	3.49327	6.11998	6.0752e-09	1.75349e-07	10.0394
PROSER2	1.21641	3.88823	-6.11674	6.17738e-09	1.78033e-07	10.0233
ABI1	-0.620351	6.22118	6.10696	6.49694e-09	1.86965e-07	9.97459
PNMA8A	1.54309	1.92994	-6.10478	6.57017e-09	1.88793e-07	9.96377
CLDN1	-1.97761	8.00248	6.10432	6.58562e-09	1.88957e-07	9.9615
AGR2	2.58069	6.19489	-6.1003	6.72362e-09	1.92631e-07	9.94148
TMEM231	0.883398	2.07383	-6.09834	6.79169e-09	1.94294e-07	9.93175
KCNN4	1.41487	4.8827	-6.09716	6.83322e-09	1.95194e-07	9.92587
LRFN4	0.970471	4.55452	-6.09591	6.87727e-09	1.96164e-07	9.91966
PIGR	3.11181	4.00032	-6.0925	6.99875e-09	1.99336e-07	9.90276
TTLL6	0.601957	0.385503	-6.09042	7.07409e-09	2.01186e-07	9.89242
GLB1	0.595191	5.59382	-6.08432	7.29962e-09	2.07296e-07	9.86212
IRF5	-0.96638	4.53142	6.08241	7.37145e-09	2.0903e-07	9.85267
TMEM92	1.24083	3.1862	-6.07662	7.59427e-09	2.15034e-07	9.82392
MCRIP1	0.630538	5.55083	-6.06603	8.01841e-09	2.26383e-07	9.77146
PLEKHA6	1.38681	3.64691	-6.06353	8.1218e-09	2.28969e-07	9.75909
ERGIC1	0.701271	5.15015	-6.06216	8.17929e-09	2.29935e-07	9.75228
CLIC5	0.962179	1.39453	-6.06215	8.17978e-09	2.29935e-07	9.75222
LSP1	-1.10741	5.29144	6.06132	8.21471e-09	2.30583e-07	9.74811
GHDC	0.594409	4.53685	-6.06015	8.26416e-09	2.31635e-07	9.74232
MAB21L3	-0.911855	1.19096	6.05484	8.4919e-09	2.37675e-07	9.71608
PIR	-1.12959	5.09611	6.04856	8.76961e-09	2.44741e-07	9.68502
PTP4A1	0.889191	6.68429	-6.037	9.30429e-09	2.58547e-07	9.6279
CDC42SE1	-0.698729	7.06867	6.03284	9.50465e-09	2.63737e-07	9.60734
RSPH4A	0.953274	0.909575	-6.03196	9.54718e-09	2.64539e-07	9.60303
SLC39A8	0.969927	3.87639	-6.02866	9.70968e-09	2.68252e-07	9.58674
PDE8B	0.86949	2.02409	-6.0284	9.7227e-09	2.68252e-07	9.58545
CMTM7	1.12779	3.87837	-6.02355	9.96695e-09	2.73823e-07	9.5615
TMEM9	0.616255	6.48431	-6.02283	1.00035e-08	2.74438e-07	9.55797
STARD13	0.684231	1.9816	-6.01873	1.02151e-08	2.79452e-07	9.53778
PRKAA2	1.12597	1.63714	-6.01618	1.0349e-08	2.82321e-07	9.5252
MUC5AC	1.76988	1.21335	-6.01526	1.03976e-08	2.83246e-07	9.52069
RARA	0.616978	4.48188	-6.0145	1.04383e-08	2.83956e-07	9.51692
PPP1R36	0.805975	1.12116	-6.01196	1.05745e-08	2.87064e-07	9.5044
CLDN3	2.66451	4.85812	-6.01022	1.06684e-08	2.89e-07	9.49587
PLA2G4F	-1.18521	2.38954	6.00762	1.08111e-08	2.92217e-07	9.48306
PARD3B	0.812039	1.42273	-6.00734	1.08265e-08	2.92217e-07	9.48168
KIAA1549	0.94203	1.34878	-6.0044	1.09904e-08	2.95659e-07	9.46718
ATP6V1B1	1.64797	2.76329	-6.00197	1.11274e-08	2.98928e-07	9.45523
IVD	0.730292	4.63398	-6.00131	1.11649e-08	2.99521e-07	9.45199
FZD4	0.754781	2.51553	-5.99943	1.12721e-08	3.01147e-07	9.44277
KLHL14	1.24385	0.816003	-5.99341	1.16234e-08	3.09257e-07	9.41315
MNX1	0.831933	1.28353	-5.99244	1.16808e-08	3.10357e-07	9.4084
FGFBP1	-2.37161	6.61209	5.97857	1.2535e-08	3.31691e-07	9.34031
MAPK6	-0.766393	5.51251	5.96802	1.32258e-08	3.49018e-07	9.28856
NTHL1	0.664388	4.86572	-5.96701	1.32938e-08	3.50336e-07	9.28361
SMIM24	1.46168	1.38446	-5.96437	1.34737e-08	3.54593e-07	9.27065
PHLDB3	-0.707098	3.88733	5.96135	1.36816e-08	3.59579e-07	9.25588
B9D1	0.688898	3.11933	-5.95971	1.37959e-08	3.62091e-07	9.24785
FAM83F	-1.00802	2.77999	5.95639	1.40306e-08	3.67752e-07	9.23159
ARMC9	0.62954	1.96933	-5.95595	1.40621e-08	3.68081e-07	9.22942
SLC29A2	0.808137	4.55746	-5.95415	1.41907e-08	3.70946e-07	9.22064
ASRGL1	1.58497	3.3624	-5.95168	1.43696e-08	3.74613e-07	9.20856
KCTD15	-0.978362	4.68149	5.95031	1.447e-08	3.76726e-07	9.20184
PIH1D2	0.591434	1.53939	-5.9473	1.46922e-08	3.81996e-07	9.18715
SOBP	0.985202	1.31769	-5.94003	1.52439e-08	3.95812e-07	9.15159
CARD17	-1.12879	1.88337	5.92708	1.62767e-08	4.215e-07	9.08837
TNFSF10	-1.23751	8.37134	5.92537	1.64177e-08	4.24019e-07	9.08005
NFATC4	1.00339	2.74546	-5.92479	1.64662e-08	4.24223e-07	9.07721
KLF8	-1.02849	1.83932	5.92475	1.64694e-08	4.24223e-07	9.07702
CACNG6	1.15507	0.601025	-5.92198	1.67016e-08	4.29635e-07	9.06352
NOD2	-0.910307	2.54126	5.92044	1.68322e-08	4.31926e-07	9.05601
RIMKLB	0.884092	3.90322	-5.92041	1.68352e-08	4.31926e-07	9.05583
TMEM97	0.759176	5.4029	-5.91941	1.69208e-08	4.33548e-07	9.05095
RNF186	0.872817	0.476822	-5.91536	1.72701e-08	4.41331e-07	9.03125
SMPDL3B	1.17628	4.55263	-5.91457	1.7339e-08	4.42511e-07	9.0274
GDF15	1.62404	5.23086	-5.91334	1.74477e-08	4.44699e-07	9.02138
PLP2	-0.73555	9.79047	5.91123	1.76346e-08	4.48487e-07	9.0111
FMO5	0.864554	1.35709	-5.91114	1.76426e-08	4.48487e-07	9.01067
PRR15	1.80466	3.58019	-5.90948	1.77909e-08	4.51666e-07	9.00259
GPX8	0.857673	4.36841	-5.90745	1.79746e-08	4.55733e-07	8.99269
SHANK2	0.769861	1.07985	-5.90676	1.80375e-08	4.56731e-07	8.98932
EFCAB12	0.595518	0.533693	-5.90596	1.81105e-08	4.5798e-07	8.98543
NOSTRIN	0.647508	1.62688	-5.90478	1.82181e-08	4.60102e-07	8.97972
AIM2	-1.99472	4.34706	5.90076	1.85917e-08	4.68318e-07	8.96014
S100A12	-1.8563	3.44831	5.89937	1.87228e-08	4.71009e-07	8.95337
SLC23A1	0.746633	0.960382	-5.896	1.90432e-08	4.78171e-07	8.93701
B3GNT8	-1.04524	3.93603	5.89586	1.90568e-08	4.78171e-07	8.93632
IFITM2	1.0501	7.33531	-5.89019	1.96096e-08	4.896e-07	8.90876
NXNL2	0.884036	1.07106	-5.88744	1.98829e-08	4.95684e-07	8.89541
KLHL29	0.819625	1.54847	-5.88719	1.99081e-08	4.95684e-07	8.89419
WASF2	-0.697311	6.86363	5.8845	2.01803e-08	5.01817e-07	8.8811
TRIM36	0.838994	1.38234	-5.88294	2.03385e-08	5.05087e-07	8.87357
MORN2	0.646683	5.27708	-5.8827	2.03639e-08	5.05087e-07	8.87237
CCDC33	0.704041	0.39209	-5.8824	2.03944e-08	5.05197e-07	8.87093
SUSD4	-1.52346	4.73868	5.88166	2.04704e-08	5.06433e-07	8.86734
ARL11	-0.729279	1.70082	5.87751	2.09029e-08	5.16474e-07	8.84719
MAATS1	1.1641	0.99238	-5.87687	2.09699e-08	5.17471e-07	8.8441
ABCC6	0.812644	1.13126	-5.87206	2.14838e-08	5.29478e-07	8.82076
HNF1B	1.13354	0.674951	-5.87164	2.15295e-08	5.29932e-07	8.81871
NEU4	0.836653	0.726242	-5.87111	2.15862e-08	5.30654e-07	8.81618
PPM1J	-0.705553	2.63711	5.86989	2.17198e-08	5.33262e-07	8.81023
PERM1	-0.834523	2.42844	5.86629	2.21163e-08	5.4231e-07	8.79279
HTR1D	1.08387	1.14102	-5.86494	2.22666e-08	5.45307e-07	8.78627
AHDC1	-0.67258	4.65325	5.86459	2.23063e-08	5.45589e-07	8.78455
SLC25A43	-0.787978	5.15103	5.86314	2.2469e-08	5.48323e-07	8.77755
TLR2	-0.823436	4.02763	5.85934	2.29026e-08	5.58064e-07	8.75912
C3orf70	-0.907108	1.74739	5.85811	2.3044e-08	5.60806e-07	8.75319
B3GNT3	1.682	5.11481	-5.85053	2.39387e-08	5.80394e-07	8.71648
ADAP1	1.03923	2.90312	-5.84946	2.40668e-08	5.8277e-07	8.71134
ALPP	1.41852	1.11909	-5.84833	2.42043e-08	5.8537e-07	8.70584
USP31	-0.609906	3.33981	5.84104	2.5106e-08	6.05666e-07	8.6706
SPRR4	-1.5284	1.40843	5.83922	2.5335e-08	6.10432e-07	8.66184
TPM1	1.16037	5.0445	-5.8351	2.58636e-08	6.22394e-07	8.64195
PHYH	0.9879	4.07249	-5.83349	2.6073e-08	6.26467e-07	8.63417
CCNA1	1.45349	1.23564	-5.83331	2.60974e-08	6.26467e-07	8.63327
ENPP1	0.894316	1.20063	-5.82912	2.665e-08	6.38846e-07	8.61308
TMOD1	1.15905	2.04044	-5.82891	2.6679e-08	6.38846e-07	8.61203
AOC1	1.88995	2.30982	-5.81909	2.80221e-08	6.69356e-07	8.56471
TSPAN3	0.786698	6.2322	-5.8145	2.86733e-08	6.8368e-07	8.54257
CFAP73	1.21254	1.85852	-5.81437	2.86923e-08	6.8368e-07	8.54193
C9orf24	1.36967	1.54495	-5.81329	2.88472e-08	6.86528e-07	8.53675
MYO7B	1.17537	0.783631	-5.81243	2.89712e-08	6.88634e-07	8.53261
LRRC75A	0.661711	1.54197	-5.80862	2.95292e-08	7.0018e-07	8.51423
GATA6	0.988212	2.35002	-5.80697	2.97729e-08	7.04239e-07	8.50631
EPHA10	0.874761	1.28962	-5.80332	3.03201e-08	7.1627e-07	8.48877
DENND6B	0.722648	2.94995	-5.80287	3.03894e-08	7.1627e-07	8.48657
RHBDL2	-1.01088	4.52047	5.80225	3.04826e-08	7.16835e-07	8.48362
MORN5	1.03347	0.750435	-5.8022	3.04902e-08	7.16835e-07	8.48338
CCDC160	1.23138	1.42477	-5.79981	3.08572e-08	7.24584e-07	8.47185
SGK1	-1.10143	5.66096	5.79469	3.1655e-08	7.42419e-07	8.44726
FZD2	0.942614	3.69175	-5.79358	3.18311e-08	7.45647e-07	8.44192
PAX8	1.81223	2.52479	-5.78959	3.24704e-08	7.59706e-07	8.42276
NIPAL4	-1.73481	2.70344	5.78718	3.28642e-08	7.67992e-07	8.41115
INPP1	-1.01234	5.7116	5.78494	3.32329e-08	7.75674e-07	8.4004
TM4SF5	1.10973	0.66061	-5.77965	3.41192e-08	7.94449e-07	8.37505
PRKCG	0.866416	0.560822	-5.7757	3.47976e-08	8.08305e-07	8.35609
SPAG6	1.12002	0.737331	-5.7747	3.4972e-08	8.11384e-07	8.35127
TMPRSS11B	-1.62339	1.25532	5.77432	3.50384e-08	8.11953e-07	8.34944
PRKCA	0.854694	2.70837	-5.77155	3.55233e-08	8.22207e-07	8.33621
ENPP3	1.22901	0.88119	-5.77031	3.57437e-08	8.26323e-07	8.33025
RHOB	0.913212	7.58914	-5.76913	3.59543e-08	8.30202e-07	8.32459
SPAG4	0.782281	3.18993	-5.76608	3.65045e-08	8.38912e-07	8.30996
MREG	-0.727225	5.14322	5.7608	3.74759e-08	8.59981e-07	8.28467
SVOPL	0.66734	0.703384	-5.76033	3.75622e-08	8.60162e-07	8.28246
METTL7B	1.47395	2.15414	-5.75585	3.84081e-08	8.78494e-07	8.26101
ETV3	-0.700211	4.67696	5.75387	3.87878e-08	8.86134e-07	8.25154
HOXC4	1.02978	2.25972	-5.75108	3.9329e-08	8.97441e-07	8.23819
GCNT1	1.08913	3.35504	-5.74705	4.01244e-08	9.14517e-07	8.21891
KBTBD11	0.860844	1.28895	-5.74505	4.0525e-08	9.22563e-07	8.20934
LGI3	-1.00399	0.876361	5.74269	4.10018e-08	9.32323e-07	8.19808
ITPRIP	-0.868854	4.9414	5.74174	4.11953e-08	9.35626e-07	8.19355
CLDND1	-0.705229	5.9515	5.74034	4.14814e-08	9.4102e-07	8.18688
WDR91	-0.732078	4.47185	5.73916	4.17267e-08	9.4548e-07	8.18121
FGF11	-0.688459	0.985174	5.73865	4.18314e-08	9.4644e-07	8.17879
B3GNT5	-0.938539	4.66041	5.73848	4.18667e-08	9.4644e-07	8.17798
ZBBX	0.880846	0.50091	-5.73664	4.2251e-08	9.53932e-07	8.16918
PRDM1	-0.831949	4.08234	5.73642	4.22964e-08	9.53932e-07	8.16815
RNF168	-0.698181	5.12543	5.73559	4.24704e-08	9.56744e-07	8.16419
PIGT	0.585074	7.77492	-5.73173	4.32916e-08	9.7411e-07	8.14576
BBC3	0.690762	4.09888	-5.72846	4.39993e-08	9.87604e-07	8.13014
SFTA2	2.07274	2.31213	-5.72825	4.4044e-08	9.87604e-07	8.12917
PDE4A	0.74101	3.22056	-5.72671	4.43817e-08	9.94026e-07	8.12181
RETREG1	0.985495	2.12667	-5.72614	4.45074e-08	9.95693e-07	8.11909
MSLN	2.48536	5.92395	-5.72501	4.47571e-08	1.00013e-06	8.1137
SERPINB6	0.78281	6.25932	-5.72379	4.50278e-08	1.00502e-06	8.1079
FXYD4	0.858002	0.624096	-5.71489	4.7055e-08	1.04906e-06	8.0655
FAM227A	0.668366	0.910401	-5.71439	4.71726e-08	1.05047e-06	8.0631
FADS3	1.04269	3.34489	-5.71252	4.76107e-08	1.05901e-06	8.0542
SPRR2F	-2.2372	2.40695	5.71224	4.76756e-08	1.05923e-06	8.05289
DGKA	-0.773319	5.05101	5.71201	4.773e-08	1.05923e-06	8.05179
RGS14	-0.682797	5.01375	5.71159	4.783e-08	1.06024e-06	8.04977
SEMA4G	0.939163	1.75523	-5.71037	4.81186e-08	1.06542e-06	8.04398
SLC46A1	0.588934	2.00458	-5.70784	4.87239e-08	1.07636e-06	8.03195
HSPA4L	-0.958152	3.57708	5.70352	4.97754e-08	1.09709e-06	8.0114
LRRIQ1	0.786998	0.681959	-5.70135	5.03113e-08	1.10765e-06	8.00109
NTRK2	-1.53641	1.86775	5.7	5.06479e-08	1.11379e-06	7.99467
LGR6	1.20294	1.63511	-5.69785	5.11878e-08	1.12175e-06	7.98446
PTPRR	0.834622	0.774124	-5.6954	5.18119e-08	1.13042e-06	7.9728
MORN4	0.725027	2.40072	-5.69393	5.21876e-08	1.13621e-06	7.96584
SLC2A10	1.36024	3.03088	-5.69391	5.21945e-08	1.13621e-06	7.96572
JARID2	-0.640138	4.44754	5.6928	5.2481e-08	1.14117e-06	7.96045
GPRC5A	1.35551	6.02585	-5.68934	5.33826e-08	1.15947e-06	7.94405
SVIL	-0.793876	5.06389	5.68687	5.40381e-08	1.17109e-06	7.9323
LRATD1	-1.41363	4.3798	5.68495	5.45526e-08	1.18092e-06	7.92318
CPLX1	0.842074	1.98836	-5.68154	5.54773e-08	1.19826e-06	7.90701
WTIP	0.682522	1.81923	-5.68084	5.56695e-08	1.20026e-06	7.90368
DRAM1	0.965901	4.94741	-5.68052	5.57557e-08	1.20026e-06	7.90219
TBC1D16	0.948551	3.16627	-5.67834	5.63573e-08	1.21053e-06	7.89186
HNF4G	1.05928	1.33978	-5.6762	5.69552e-08	1.22067e-06	7.8817
FKBP10	1.32219	5.24479	-5.67551	5.7148e-08	1.22345e-06	7.87845
RIMS3	-0.737427	1.69972	5.67263	5.79662e-08	1.23959e-06	7.86477
MFAP3L	0.786669	1.09235	-5.67077	5.84997e-08	1.24838e-06	7.85596
PARVA	0.637329	4.43131	-5.67074	5.85058e-08	1.24838e-06	7.85585
STK32C	0.637815	3.51343	-5.6685	5.91566e-08	1.26088e-06	7.84521
FOXN4	0.807236	0.479483	-5.66784	5.93475e-08	1.26356e-06	7.84211
NME5	0.866689	0.661618	-5.6661	5.98577e-08	1.27303e-06	7.83387
SLC17A9	0.994327	2.37345	-5.66274	6.08566e-08	1.29285e-06	7.81795
ERMAP	-0.603649	3.55095	5.66082	6.14333e-08	1.30368e-06	7.80887
CD109	-1.27996	4.47678	5.65738	6.24794e-08	1.32443e-06	7.79262
TMC4	0.898522	6.00876	-5.65587	6.29452e-08	1.33193e-06	7.78547
MYCBP2	-0.736505	3.9526	5.65437	6.34106e-08	1.33977e-06	7.77839
RNFT2	0.765049	1.74492	-5.65181	6.42144e-08	1.35528e-06	7.76627
LGALS7	-2.54116	3.92519	5.6503	6.4691e-08	1.36385e-06	7.75915
PLD4	-0.641487	1.2071	5.64745	6.56031e-08	1.38158e-06	7.74568
ACVR1C	-0.601904	1.01101	5.64709	6.57191e-08	1.38252e-06	7.74398
SOWAHA	1.12288	1.55675	-5.63929	6.82843e-08	1.43028e-06	7.70714
HCAR3	-1.30241	2.22118	5.63806	6.86972e-08	1.43628e-06	7.70134
RAB27B	-1.02645	4.21052	5.63799	6.87189e-08	1.43628e-06	7.70104
NPDC1	1.03459	5.24486	-5.635	6.9735e-08	1.45439e-06	7.68692
RBPMS	0.892876	3.74169	-5.63201	7.07629e-08	1.47424e-06	7.67284
SYN1	0.756254	1.17288	-5.62816	7.21126e-08	1.50075e-06	7.65466
DNAJC10	0.671625	4.04153	-5.62418	7.35318e-08	1.52537e-06	7.63592
TSC22D1	0.802382	6.08191	-5.62352	7.37704e-08	1.52869e-06	7.6328
LRRIQ4	0.75325	0.585805	-5.62285	7.40117e-08	1.53205e-06	7.62966
CMBL	1.24704	4.29509	-5.62152	7.44966e-08	1.53949e-06	7.62338
RBPMS2	1.05201	2.15493	-5.62142	7.45299e-08	1.53949e-06	7.62295
ADGRD2	-0.761365	0.927447	5.62049	7.48712e-08	1.5449e-06	7.61855
PIWIL4	0.727504	1.33124	-5.61952	7.52286e-08	1.55062e-06	7.61397
TSPAN12	1.31259	2.91399	-5.61885	7.54749e-08	1.55405e-06	7.61083
ENPP4	1.30198	2.55105	-5.61826	7.56947e-08	1.55692e-06	7.60803
JHY	0.849639	1.48269	-5.61732	7.60418e-08	1.5624e-06	7.60363
GALNT10	0.719313	3.85807	-5.61237	7.79064e-08	1.59574e-06	7.58033
KCND3	-1.02119	2.00089	5.61235	7.79113e-08	1.59574e-06	7.58027
TSLP	-0.808199	1.32339	5.60934	7.90667e-08	1.6177e-06	7.56611
MAPK15	1.35975	2.98762	-5.60703	7.99659e-08	1.63093e-06	7.55523
IL36RN	-1.46373	1.7823	5.60326	8.14504e-08	1.65947e-06	7.53754
GMPR	1.11643	3.30595	-5.59957	8.29342e-08	1.68615e-06	7.52018
ALDOC	-1.16598	4.61546	5.59865	8.3307e-08	1.69196e-06	7.51587
EFHC1	0.807457	2.86366	-5.59781	8.36505e-08	1.69539e-06	7.51191
TRIM69	-0.621967	4.36936	5.59701	8.39761e-08	1.70021e-06	7.50817
PKIG	0.823092	4.50162	-5.59607	8.43629e-08	1.70626e-06	7.50375
GNG12	-0.6983	6.40034	5.59436	8.50692e-08	1.71875e-06	7.49573
MAST4	-0.84552	3.85518	5.59369	8.53467e-08	1.72174e-06	7.4926
MORC3	-0.698191	4.59679	5.59358	8.53948e-08	1.72174e-06	7.49206
GNAI1	-0.908799	4.87058	5.59127	8.63599e-08	1.73939e-06	7.48125
CRIP1	0.911602	3.01249	-5.5892	8.72363e-08	1.75303e-06	7.47154
TYMP	-0.978207	7.99319	5.58905	8.73012e-08	1.75303e-06	7.47083
BPIFB1	2.40186	2.53196	-5.58903	8.73082e-08	1.75303e-06	7.47075
TNNC2	1.3936	2.42321	-5.58774	8.78616e-08	1.76232e-06	7.46467
SCARB1	0.710863	4.25536	-5.58544	8.88524e-08	1.77852e-06	7.45389
MDFI	-1.0486	5.87918	5.58463	8.92051e-08	1.7819e-06	7.45008
HNF1A	0.777643	0.402963	-5.58188	9.04068e-08	1.80219e-06	7.43721
VWA7	0.830231	1.82968	-5.58078	9.08927e-08	1.81002e-06	7.43206
C2orf72	1.10598	1.16513	-5.57972	9.13648e-08	1.81755e-06	7.42708
LY6D	-2.39466	8.38587	5.57518	9.34041e-08	1.85621e-06	7.40585
RAMP1	1.3606	4.86824	-5.57347	9.41885e-08	1.86989e-06	7.39781
CCDC8	1.46679	3.14985	-5.5729	9.44503e-08	1.87317e-06	7.39514
SHROOM2	-0.714145	3.51495	5.57128	9.51953e-08	1.88601e-06	7.38759
NIPAL2	-0.883653	4.58176	5.57018	9.57086e-08	1.89425e-06	7.38242
PIM1	-0.780033	6.88995	5.56895	9.62792e-08	1.9036e-06	7.3767
CPNE8	-1.06475	3.13159	5.56806	9.67013e-08	1.91e-06	7.3725
CRELD1	0.5936	4.65102	-5.56411	9.8576e-08	1.94505e-06	7.35404
NNMT	1.42931	5.58604	-5.56245	9.93738e-08	1.9587e-06	7.34629
CFAP46	0.643526	0.3931	-5.56079	1.00178e-07	1.97065e-06	7.33853
SEZ6L2	1.27579	4.9037	-5.55935	1.00882e-07	1.98247e-06	7.33181
ARHGEF4	-1.12568	3.85515	5.55834	1.01377e-07	1.98817e-06	7.3271
BACE2	0.759911	5.0859	-5.55805	1.01522e-07	1.989e-06	7.32573
TNFRSF18	-1.143	5.17902	5.55745	1.01819e-07	1.9922e-06	7.32292
AOPEP	-0.849307	4.56087	5.5573	1.0189e-07	1.9922e-06	7.32225
PRNP	-1.00098	7.23687	5.55546	1.02806e-07	2.00809e-06	7.31364
EPHX2	-1.01793	3.88092	5.55285	1.04119e-07	2.02761e-06	7.30144
SLAIN1	0.958647	1.4029	-5.55205	1.04522e-07	2.0334e-06	7.29773
SERPINB12	-1.8377	1.48331	5.55085	1.05136e-07	2.0433e-06	7.2921
KISS1	0.974248	1.10356	-5.54958	1.05784e-07	2.05383e-06	7.28619
TMEM213	0.980239	0.54435	-5.54696	1.07137e-07	2.07804e-06	7.27397
HS3ST4	-0.960074	0.65863	5.54584	1.07725e-07	2.08735e-06	7.26871
PDE3A	1.04522	1.26426	-5.54521	1.08055e-07	2.09164e-06	7.26578
ACP6	0.599942	2.60532	-5.53765	1.12087e-07	2.16537e-06	7.23056
CAPN9	0.820279	0.745911	-5.52763	1.17662e-07	2.27081e-06	7.18391
FZD3	0.76601	1.23561	-5.52462	1.19393e-07	2.29965e-06	7.16987
KRT3	-0.879801	0.850443	5.52374	1.19899e-07	2.30711e-06	7.1658
CA8	1.07133	0.748542	-5.52181	1.21027e-07	2.3265e-06	7.1568
ANG	0.98636	3.78732	-5.51974	1.22245e-07	2.34759e-06	7.14718
TLE4	-0.800096	3.50513	5.51923	1.22544e-07	2.351e-06	7.14483
RORC	1.18576	2.59664	-5.51878	1.22811e-07	2.3538e-06	7.14274
SLC44A4	2.05971	4.42357	-5.51834	1.23076e-07	2.35654e-06	7.14067
MYO5A	-0.750322	3.06594	5.51688	1.23947e-07	2.37088e-06	7.1339
KDELR3	0.990247	4.72573	-5.51098	1.27534e-07	2.43709e-06	7.10648
ENKUR	0.750601	1.01661	-5.50998	1.28153e-07	2.44651e-06	7.10183
PATZ1	0.752569	4.86273	-5.50846	1.29095e-07	2.46207e-06	7.09479
CFL2	0.679719	3.35355	-5.50708	1.29961e-07	2.47616e-06	7.08836
SEMA3A	1.16182	1.54092	-5.50592	1.30689e-07	2.48758e-06	7.08299
DECR2	0.59905	3.98594	-5.50562	1.30878e-07	2.48874e-06	7.0816
P2RX7	-0.74959	1.83295	5.50392	1.31959e-07	2.50439e-06	7.0737
CLRN3	1.34661	0.731794	-5.49909	1.35073e-07	2.55847e-06	7.05129
PIGN	-0.605381	4.04603	5.49832	1.3557e-07	2.56538e-06	7.04776
OVOL2	0.775602	4.2794	-5.49671	1.36628e-07	2.58007e-06	7.04029
CDHR5	1.18459	0.752781	-5.49654	1.36741e-07	2.58007e-06	7.0395
ZNF433	0.925213	1.85805	-5.49654	1.36745e-07	2.58007e-06	7.03947
TST	0.756233	6.16411	-5.49547	1.37452e-07	2.59088e-06	7.03452
PPP1R26	0.734767	4.37184	-5.49364	1.38671e-07	2.61132e-06	7.02603
TLCD4	0.979512	2.27776	-5.49241	1.39491e-07	2.62421e-06	7.02037
EVA1A	1.04919	2.26726	-5.48306	1.45926e-07	2.74261e-06	6.97704
SGK2	0.843728	0.847019	-5.48169	1.46893e-07	2.75811e-06	6.97069
MCRIP2	0.702974	4.20002	-5.48049	1.47737e-07	2.77129e-06	6.96519
ADRA1B	0.696817	0.575473	-5.47957	1.48393e-07	2.78091e-06	6.96093
LRRC46	0.706555	1.72276	-5.47705	1.50205e-07	2.81214e-06	6.94927
NOG	0.797145	0.694691	-5.47463	1.51965e-07	2.8396e-06	6.93808
PECR	0.815753	3.14738	-5.47242	1.53594e-07	2.86729e-06	6.92784
C4orf47	0.793087	1.7962	-5.47032	1.55154e-07	2.89231e-06	6.91813
DRC7	0.647335	0.383335	-5.46529	1.5895e-07	2.95589e-06	6.89492
SPACA6	0.72049	2.36117	-5.46277	1.6089e-07	2.98909e-06	6.88327
CDKN2B	-0.969813	6.04322	5.44764	1.73006e-07	3.20515e-06	6.81353
CD274	-1.10377	3.4319	5.44612	1.74276e-07	3.22418e-06	6.8065
QPRT	1.36379	2.97293	-5.446	1.74374e-07	3.22418e-06	6.80596
TESC	1.34736	2.24619	-5.44543	1.74848e-07	3.2244e-06	6.80336
PXDN	1.33289	4.00112	-5.44539	1.74885e-07	3.2244e-06	6.80316
SLC16A4	0.960374	1.68574	-5.44513	1.75103e-07	3.22474e-06	6.80196
PADI3	-2.06664	3.17903	5.44497	1.75236e-07	3.22474e-06	6.80123
ME1	-1.2465	3.51285	5.44215	1.77621e-07	3.26244e-06	6.78825
ARHGEF17	0.663825	3.48171	-5.44179	1.77925e-07	3.26494e-06	6.7866
CEP112	0.640144	1.44135	-5.4411	1.78516e-07	3.26803e-06	6.78342
FRMD8	-0.657281	6.3701	5.44105	1.78563e-07	3.26803e-06	6.78317
RDM1	0.720216	2.11682	-5.44101	1.786e-07	3.26803e-06	6.78297
CXCR2	-1.02336	1.48661	5.43885	1.80452e-07	3.29572e-06	6.77306
CCL22	-0.948001	3.02543	5.4336	1.85049e-07	3.37332e-06	6.74891
B3GNT7	1.06573	3.55043	-5.43265	1.85891e-07	3.38549e-06	6.74455
REPS2	0.73003	2.30804	-5.43176	1.86692e-07	3.39689e-06	6.74042
TFPI2	1.65268	2.30714	-5.43128	1.87115e-07	3.3982e-06	6.73825
LRRC43	0.639791	0.700807	-5.43054	1.87779e-07	3.40708e-06	6.73484
IGF2BP1	1.05438	1.13122	-5.42855	1.89576e-07	3.43407e-06	6.7257
HORMAD1	-1.35014	2.05342	5.42832	1.89784e-07	3.43407e-06	6.72465
KRT1	-2.23593	2.46764	5.42352	1.94193e-07	3.50378e-06	6.7026
IFT22	0.590306	4.16084	-5.42329	1.94408e-07	3.50441e-06	6.70153
HTR7	-1.04252	1.27418	5.42179	1.95808e-07	3.52309e-06	6.69464
LRRC31	1.08741	0.672017	-5.4197	1.97777e-07	3.55521e-06	6.68504
STAR	-0.688992	0.678236	5.4181	1.99293e-07	3.57915e-06	6.67771
TMEM178A	1.06982	1.21691	-5.41771	1.99669e-07	3.58258e-06	6.6759
PPL	-0.949025	6.71361	5.41385	2.0338e-07	3.6458e-06	6.65822
AQP3	-1.66019	8.94657	5.41065	2.06515e-07	3.69859e-06	6.64353
MS4A8	1.21679	0.74181	-5.40809	2.09052e-07	3.74057e-06	6.63181
TNFRSF10C	0.715552	1.53812	-5.40542	2.11734e-07	3.78111e-06	6.61957
EYA4	0.8468	0.64857	-5.40526	2.11903e-07	3.78111e-06	6.61881
SIGIRR	0.672868	5.37678	-5.39839	2.18962e-07	3.89632e-06	6.58735
VIL1	1.21071	0.754879	-5.39766	2.19723e-07	3.90269e-06	6.58402
HNF4A	1.0406	0.624436	-5.3973	2.20103e-07	3.90586e-06	6.58236
SERTAD2	-0.636632	4.94996	5.39702	2.20388e-07	3.90641e-06	6.58112
NSG1	-1.35848	2.54447	5.39688	2.20536e-07	3.90641e-06	6.58047
FGF18	0.99336	1.13912	-5.39644	2.21003e-07	3.91111e-06	6.57844
SCGB2A1	2.34029	2.80166	-5.39496	2.2257e-07	3.93524e-06	6.57166
PEG10	1.92043	2.69672	-5.39361	2.24009e-07	3.95709e-06	6.56547
ERICH2	1.06152	1.5682	-5.39282	2.24849e-07	3.96831e-06	6.56188
CHRNA9	0.813354	0.559589	-5.39162	2.26142e-07	3.98389e-06	6.55638
CEP126	0.799025	1.53753	-5.38991	2.27987e-07	4.01274e-06	6.54858
PNMA6A	1.22831	1.55335	-5.38874	2.29258e-07	4.0289e-06	6.54324
MYCL	-1.06536	3.95389	5.38869	2.29321e-07	4.0289e-06	6.54298
C11orf86	0.767888	0.430462	-5.38529	2.33056e-07	4.08712e-06	6.52747
FZD6	-0.83465	6.14168	5.38428	2.34188e-07	4.10326e-06	6.52282
MAOA	-1.27104	4.96154	5.38217	2.36542e-07	4.14077e-06	6.51322
C6orf118	0.858649	0.539017	-5.37843	2.40799e-07	4.2077e-06	6.4961
RAET1E	-1.14857	2.42955	5.37771	2.4162e-07	4.21824e-06	6.49284
PARD6B	0.716041	3.15775	-5.3767	2.42784e-07	4.23277e-06	6.48823
MYRIP	0.622878	0.632516	-5.37658	2.42921e-07	4.23277e-06	6.48769
SCX	0.871325	3.13751	-5.37362	2.46362e-07	4.28559e-06	6.47419
LGALS3BP	0.631897	9.37616	-5.37066	2.49853e-07	4.33855e-06	6.46068
C3	1.4855	6.29755	-5.36834	2.52626e-07	4.37885e-06	6.45009
SHOC1	-0.74008	1.82475	5.36661	2.54712e-07	4.41106e-06	6.4422
LRRC10B	1.13165	1.51389	-5.36185	2.60534e-07	4.49984e-06	6.42052
ACAP2	-0.672328	4.61564	5.36138	2.61112e-07	4.50581e-06	6.41839
CCDC65	0.62346	1.61943	-5.36071	2.61946e-07	4.50794e-06	6.41533
HES6	1.30232	4.77195	-5.3606	2.62083e-07	4.50794e-06	6.41483
PPIL6	0.820322	1.25882	-5.36053	2.62165e-07	4.50794e-06	6.41453
SPEF2	0.616604	0.77269	-5.35698	2.66631e-07	4.58067e-06	6.39832
PLEKHD1	0.658982	0.569388	-5.35651	2.67216e-07	4.58666e-06	6.39622
PRKAB1	0.588947	4.57944	-5.35538	2.68662e-07	4.6074e-06	6.39104
ADAM23	-1.38788	1.97819	5.35244	2.72424e-07	4.66367e-06	6.3777
OGFRL1	-0.674908	3.97138	5.34971	2.75982e-07	4.71625e-06	6.36525
NR2F2	0.937943	4.28478	-5.34736	2.79065e-07	4.76055e-06	6.35459
UNC5CL	0.7667	1.82302	-5.345	2.82212e-07	4.80333e-06	6.34383
DUOX1	-1.00941	4.97921	5.34497	2.82249e-07	4.80333e-06	6.34371
MTHFD1L	0.621681	4.85021	-5.34492	2.82316e-07	4.80333e-06	6.34348
PMEL	0.666653	2.22527	-5.34448	2.82902e-07	4.80501e-06	6.34149
TMEM62	0.657059	4.0195	-5.34447	2.8291e-07	4.80501e-06	6.34146
GKAP1	0.666475	2.56137	-5.34354	2.84162e-07	4.82205e-06	6.33723
AGL	-0.729369	4.34405	5.3418	2.86519e-07	4.85356e-06	6.3293
ANO5	0.655953	0.49772	-5.33828	2.91326e-07	4.93069e-06	6.31334
FLRT3	1.30553	2.14777	-5.3297	3.03401e-07	5.1261e-06	6.27438
PDZK1	0.730405	0.930891	-5.32348	3.12458e-07	5.27454e-06	6.24617
ACBD4	0.615737	3.29999	-5.32262	3.1372e-07	5.29123e-06	6.2423
E2F2	-0.700095	4.35277	5.31656	3.22836e-07	5.44025e-06	6.21483
XG	-1.32045	2.60568	5.31462	3.25796e-07	5.48536e-06	6.20608
FAM229B	0.804074	2.89885	-5.31296	3.28373e-07	5.52395e-06	6.19852
PRXL2A	-0.708578	5.78969	5.30835	3.35592e-07	5.63561e-06	6.17767
PPM1H	1.2777	2.37944	-5.29823	3.51979e-07	5.9006e-06	6.13194
SLC52A1	-1.08222	2.88279	5.29375	3.59484e-07	6.02121e-06	6.11171
EVPL	-0.872416	6.23099	5.29218	3.62148e-07	6.06059e-06	6.10463
LOXL2	1.01607	3.97541	-5.28874	3.68053e-07	6.1485e-06	6.08913
NWD1	1.00081	1.48394	-5.28857	3.68352e-07	6.1485e-06	6.08835
PLA2G10	0.936741	1.23549	-5.28729	3.7058e-07	6.18037e-06	6.08257
RASA3	0.776807	3.54371	-5.28628	3.72339e-07	6.20437e-06	6.07803
GJA1	-1.18204	6.61309	5.28329	3.7762e-07	6.28697e-06	6.06452
SPINK1	1.61737	1.28403	-5.28161	3.80607e-07	6.33127e-06	6.05697
HOXA7	-0.766177	1.97087	5.2808	3.82067e-07	6.34467e-06	6.0533
NIBAN1	-0.955709	4.63413	5.27926	3.84836e-07	6.38518e-06	6.04638
DNAJB13	0.811663	0.917173	-5.27887	3.85538e-07	6.39137e-06	6.04463
PMEPA1	0.965142	5.87235	-5.27567	3.91377e-07	6.47709e-06	6.03022
CDH6	0.956384	1.03493	-5.27323	3.95885e-07	6.54053e-06	6.01924
DIP2B	-0.628381	4.52385	5.27167	3.98802e-07	6.58312e-06	6.0122
TSPAN13	0.89901	6.53217	-5.27082	4.00397e-07	6.60382e-06	6.00838
TEKT1	0.767555	0.596181	-5.26996	4.02015e-07	6.62488e-06	6.00451
SQLE	-0.83007	5.75522	5.26972	4.02463e-07	6.62663e-06	6.00344
ALDH3B2	-1.35966	4.96461	5.26913	4.03587e-07	6.6395e-06	6.00077
SH3RF2	-0.890204	4.19276	5.26772	4.0626e-07	6.67781e-06	5.99444
C10orf55	-0.706382	1.7401	5.26686	4.07903e-07	6.69871e-06	5.99057
INSR	0.692585	3.60174	-5.26669	4.08222e-07	6.69871e-06	5.98982
KLHL30	0.648756	0.799086	-5.26472	4.12014e-07	6.75522e-06	5.98096
CPD	0.830198	4.90584	-5.26413	4.13171e-07	6.76847e-06	5.97827
SPRR2B	-1.6642	1.51409	5.25351	4.34242e-07	7.08969e-06	5.93059
CHDH	0.833415	2.41783	-5.25128	4.388e-07	7.15207e-06	5.92059
SLC16A5	0.855446	4.0141	-5.25105	4.39276e-07	7.15261e-06	5.91955
WDR38	0.936093	1.00663	-5.24915	4.43214e-07	7.20585e-06	5.91099
TMEM63C	-0.991736	1.80611	5.24588	4.50036e-07	7.31064e-06	5.89635
LPIN2	0.85378	3.86608	-5.24236	4.57522e-07	7.41362e-06	5.88054
IGFALS	1.24933	1.13987	-5.2411	4.60207e-07	7.4509e-06	5.87494
RBMS2	0.654348	4.18942	-5.23734	4.68369e-07	7.57672e-06	5.85809
HOXB5	1.45874	3.23267	-5.23641	4.70428e-07	7.59736e-06	5.85389
VWA3A	0.93607	0.593175	-5.23164	4.81011e-07	7.74892e-06	5.83257
DGKD	0.60584	2.98927	-5.2308	4.82917e-07	7.77317e-06	5.82878
LIMCH1	1.02638	2.84661	-5.22809	4.8907e-07	7.86567e-06	5.81665
RUSC2	0.592003	3.61626	-5.22754	4.90322e-07	7.87928e-06	5.8142
ALOX12	-1.04123	2.30642	5.22727	4.90937e-07	7.88263e-06	5.813
FSCN1	-1.24181	7.15197	5.22074	5.06121e-07	8.09292e-06	5.78381
CYP2E1	-0.868237	1.29474	5.21905	5.10138e-07	8.14374e-06	5.77624
CFAP157	0.702126	1.57665	-5.21754	5.13743e-07	8.18804e-06	5.76949
TGM2	1.34845	5.75082	-5.21305	5.24603e-07	8.35403e-06	5.74945
GPX2	-2.34297	5.30142	5.21206	5.27025e-07	8.3857e-06	5.74504
ENC1	0.938972	4.00463	-5.21059	5.30647e-07	8.43642e-06	5.73848
PHYHD1	1.5857	3.96526	-5.20886	5.34931e-07	8.49757e-06	5.73077
MID2	-0.764248	3.07343	5.20738	5.38638e-07	8.54246e-06	5.72416
NRIP3	-0.893827	2.94556	5.19633	5.67069e-07	8.95673e-06	5.67489
BAG2	0.777798	2.59407	-5.19519	5.70068e-07	8.99677e-06	5.66984
C1QTNF6	0.845916	3.75355	-5.19311	5.75612e-07	9.06477e-06	5.66056
HCK	-0.879104	4.2049	5.1916	5.79674e-07	9.1187e-06	5.65383
KANK2	0.654713	4.78044	-5.189	5.86704e-07	9.21777e-06	5.64228
SP5	1.13526	1.48604	-5.18296	6.03404e-07	9.45786e-06	5.61541
ITGA2	-1.18845	4.99455	5.18284	6.03732e-07	9.45786e-06	5.61488
P2RY2	-0.83763	4.02875	5.18269	6.0416e-07	9.45786e-06	5.61421
SELENBP1	1.47359	5.03665	-5.18231	6.05208e-07	9.46663e-06	5.61255
ADPRHL1	0.67049	2.26542	-5.1815	6.0749e-07	9.49467e-06	5.60894
RAET1L	-1.4626	2.86806	5.17809	6.17175e-07	9.61504e-06	5.59379
NOTCH3	-0.918592	6.37688	5.1758	6.23776e-07	9.71008e-06	5.58361
MOAP1	0.629047	5.0057	-5.1748	6.26691e-07	9.74763e-06	5.57914
NCK1	-0.680055	5.73766	5.17447	6.27632e-07	9.75445e-06	5.5777
PRSS23	0.976329	4.28179	-5.17354	6.30342e-07	9.78872e-06	5.57358
KLHL23	0.803067	3.23619	-5.17089	6.38132e-07	9.89796e-06	5.56182
GPR39	0.828402	2.3717	-5.16934	6.42747e-07	9.95744e-06	5.55492
RNASE7	-1.55857	3.13226	5.16761	6.47906e-07	1.00238e-05	5.54726
WDR78	0.621871	1.00619	-5.16756	6.48061e-07	1.00238e-05	5.54703
RASSF7	0.591579	6.29437	-5.16314	6.61462e-07	1.01904e-05	5.52744
GFPT1	0.664109	5.01587	-5.16035	6.7008e-07	1.03068e-05	5.51504
BTK	-0.633902	2.1159	5.15701	6.80499e-07	1.04505e-05	5.50027
LPCAT1	0.825022	5.06831	-5.15584	6.84178e-07	1.04987e-05	5.49511
KRT24	-1.95566	2.0712	5.15408	6.89777e-07	1.05762e-05	5.48731
CLDN10	1.63224	1.86686	-5.15295	6.93389e-07	1.06232e-05	5.4823
FAM117B	-0.729398	3.72436	5.15185	6.96939e-07	1.06606e-05	5.47742
SHH	0.983686	0.783765	-5.14872	7.07094e-07	1.0799e-05	5.46357
TNFRSF19	1.26685	2.40952	-5.14846	7.07942e-07	1.08035e-05	5.46242
ARSE	1.05749	1.13244	-5.14765	7.10584e-07	1.08183e-05	5.45885
CATSPERB	0.643059	1.07583	-5.14611	7.15682e-07	1.08873e-05	5.45201
ALPG	1.16661	0.766046	-5.14554	7.17554e-07	1.09073e-05	5.44951
PADI1	-1.61519	2.7395	5.14468	7.20397e-07	1.09419e-05	5.44572
KCNK7	-0.904296	2.07559	5.14326	7.25158e-07	1.0997e-05	5.43942
NKX2-3	-0.918967	0.864551	5.14228	7.28442e-07	1.10382e-05	5.43509
CCL15	0.754854	0.406424	-5.14172	7.30314e-07	1.10493e-05	5.43264
LTK	0.991995	1.41775	-5.13973	7.37059e-07	1.11405e-05	5.42384
ALPK3	1.26867	2.36342	-5.1396	7.37493e-07	1.11405e-05	5.42327
HOXD13	-1.30304	2.78783	5.13882	7.40168e-07	1.11722e-05	5.41981
PIP5K1B	1.0443	1.63209	-5.1382	7.42296e-07	1.11956e-05	5.41706
GPR173	0.692768	1.02163	-5.13408	7.56536e-07	1.14015e-05	5.39887
IL1RAP	-0.898845	3.64682	5.13153	7.65493e-07	1.15276e-05	5.38761
ITGA10	0.598002	0.891063	-5.12996	7.71045e-07	1.1585e-05	5.38069
SERPINA4	1.10567	0.580138	-5.12736	7.80343e-07	1.16967e-05	5.36922
PLCL2	0.822609	2.23439	-5.11965	8.08554e-07	1.21009e-05	5.33523
PRSS2	1.07961	0.691442	-5.11876	8.11878e-07	1.21319e-05	5.3313
CACNG4	1.58321	2.65291	-5.11749	8.1664e-07	1.21913e-05	5.32571
ACKR2	0.966205	1.46166	-5.11636	8.20874e-07	1.2238e-05	5.32076
ANKS4B	0.951889	0.46762	-5.11216	8.36895e-07	1.24577e-05	5.30226
SEMA4B	-0.822289	7.26498	5.11028	8.44156e-07	1.25466e-05	5.29399
GLYCTK	0.740027	2.78779	-5.10461	8.66438e-07	1.28384e-05	5.26907
TTLL12	-0.619012	6.37923	5.10284	8.73552e-07	1.2924e-05	5.26124
NPR2	0.807145	2.10428	-5.10235	8.75515e-07	1.29432e-05	5.25909
REL	-0.656197	2.17833	5.10157	8.78625e-07	1.29793e-05	5.2557
EGFL6	-1.13114	3.2412	5.10053	8.8283e-07	1.30315e-05	5.25113
FOXA3	1.52961	2.07666	-5.10011	8.84555e-07	1.30326e-05	5.24927
TRIM7	-0.915352	3.14881	5.10003	8.84863e-07	1.30326e-05	5.24893
IGSF9	-0.770117	4.94874	5.10002	8.84922e-07	1.30326e-05	5.24887
MIA	1.42116	1.28535	-5.09912	8.88584e-07	1.30766e-05	5.24492
KCNK6	-0.766573	5.03409	5.09756	8.94963e-07	1.31605e-05	5.23807
NEFL	-1.59442	1.81057	5.09614	9.00809e-07	1.32364e-05	5.23185
AC005041.1	0.844098	2.59297	-5.09029	9.25327e-07	1.35761e-05	5.20615
HSPA6	-0.995069	3.94672	5.0894	9.29112e-07	1.36214e-05	5.20225
EPHB2	0.878323	3.30363	-5.08912	9.30318e-07	1.36287e-05	5.20101
RNF225	-0.697284	1.00455	5.08769	9.36426e-07	1.37079e-05	5.19475
FSTL1	1.04134	5.78406	-5.08587	9.44287e-07	1.38021e-05	5.18675
FRY	0.605701	1.26858	-5.08392	9.5276e-07	1.3905e-05	5.17821
FYB2	0.719428	0.608712	-5.08219	9.60343e-07	1.39946e-05	5.17062
HAGHL	0.69486	2.0773	-5.08128	9.64334e-07	1.40422e-05	5.16666
GPSM1	0.735522	2.93729	-5.08037	9.68341e-07	1.409e-05	5.16269
MORC4	-0.613402	4.83677	5.07946	9.72405e-07	1.4129e-05	5.15868
FAM174B	1.15783	3.16517	-5.07665	9.8501e-07	1.42896e-05	5.14636
FKBP1B	0.864862	2.96449	-5.07567	9.89433e-07	1.43431e-05	5.14208
TMEM8B	0.672977	2.96371	-5.07501	9.92411e-07	1.43755e-05	5.1392
FAM89A	-0.965991	3.42962	5.0607	1.05951e-06	1.52822e-05	5.07663
TGM1	-1.87958	4.92813	5.06066	1.05973e-06	1.52822e-05	5.07643
LFNG	0.880059	4.54255	-5.0599	1.0634e-06	1.53124e-05	5.07312
SMPD3	0.840858	1.85378	-5.05873	1.06911e-06	1.53717e-05	5.06801
P4HTM	0.652356	3.94157	-5.05824	1.07151e-06	1.53948e-05	5.06586
S100A14	-1.20404	9.90677	5.05697	1.07773e-06	1.54727e-05	5.06033
TMTC3	-0.630935	4.49444	5.05638	1.08061e-06	1.55026e-05	5.05778
NT5E	1.19925	3.30639	-5.05484	1.08825e-06	1.56006e-05	5.05104
EXOC6B	-0.636576	3.88987	5.05398	1.09254e-06	1.56506e-05	5.04728
PLCB4	1.13158	1.49245	-5.05309	1.09698e-06	1.57026e-05	5.0434
GLI3	-0.925171	2.8434	5.05005	1.11228e-06	1.58747e-05	5.03016
VAV2	0.723357	5.21619	-5.04589	1.13361e-06	1.61317e-05	5.01199
MNDA	-0.883015	3.3101	5.04551	1.13558e-06	1.61479e-05	5.01033
C4orf48	1.00911	3.83889	-5.0444	1.14134e-06	1.62179e-05	5.00549
AMTN	-1.80312	2.46938	5.042	1.1539e-06	1.63485e-05	4.99503
CRIP2	1.05629	6.433	-5.03892	1.17018e-06	1.65428e-05	4.98164
PLA2G4E	-1.41309	2.11101	5.03582	1.18682e-06	1.67537e-05	4.96813
PYROXD2	0.802543	2.86594	-5.03234	1.20577e-06	1.70089e-05	4.95299
2022-03-02	0.725976	3.87895	-5.0288	1.22537e-06	1.72727e-05	4.93758
CMIP	-0.585622	5.11056	5.02604	1.24081e-06	1.74777e-05	4.92561
RDH16	-0.912094	1.88803	5.02585	1.24191e-06	1.74805e-05	4.92476
LRRC23	0.65284	3.25777	-5.02379	1.25359e-06	1.76209e-05	4.91581
GCNT3	1.50103	2.27588	-5.02253	1.26078e-06	1.77075e-05	4.91035
CTSE	1.72651	1.85738	-5.01806	1.28666e-06	1.80579e-05	4.89093
CHST4	0.979865	0.986671	-5.01688	1.29357e-06	1.81374e-05	4.88581
BMP4	1.15041	2.4132	-5.01677	1.2942e-06	1.81374e-05	4.88534
VSIG10L	-1.08505	3.22866	5.00754	1.34954e-06	1.8845e-05	4.84532
GCLC	-0.94316	4.32123	5.00209	1.38332e-06	1.9286e-05	4.82169
DQX1	-0.849137	3.45824	5.00196	1.38411e-06	1.9286e-05	4.82115
GNAZ	0.925064	1.99241	-5.00052	1.39319e-06	1.93847e-05	4.8149
BEST4	0.602396	1.43681	-4.99989	1.39716e-06	1.9426e-05	4.81219
FAM83D	-0.733301	6.0458	4.99802	1.40906e-06	1.95635e-05	4.80408
LRRC4	-1.35027	2.96625	4.9968	1.41689e-06	1.9658e-05	4.79879
CLMN	0.764194	2.83748	-4.99491	1.42904e-06	1.97841e-05	4.79063
AOAH	-0.849914	2.71331	4.99272	1.44328e-06	1.99671e-05	4.78115
C22orf23	-0.77279	2.50808	4.9847	1.49662e-06	2.06464e-05	4.74648
SLC2A5	-0.696294	2.06366	4.9847	1.49664e-06	2.06464e-05	4.74646
MEAK7	-0.67608	4.07342	4.98401	1.50125e-06	2.06659e-05	4.74352
GPC4	1.44638	3.56009	-4.98065	1.52426e-06	2.09529e-05	4.72899
RTN4RL1	1.13405	1.89806	-4.98013	1.52782e-06	2.0987e-05	4.72676
CFTR	1.07299	0.961046	-4.97964	1.53123e-06	2.10074e-05	4.72463
BPIFA2	0.589782	0.314299	-4.9796	1.53147e-06	2.10074e-05	4.72448
CCL19	-1.62523	4.18165	4.97773	1.54451e-06	2.11713e-05	4.71638
SYNGR3	-1.06239	3.51132	4.977	1.54959e-06	2.12259e-05	4.71325
N4BP3	-0.678653	3.47054	4.97547	1.56034e-06	2.13439e-05	4.70664
ADGRE5	0.769872	5.26718	-4.97403	1.57054e-06	2.14674e-05	4.70042
FSTL4	-0.960137	1.51561	4.97342	1.57483e-06	2.15108e-05	4.69781
CLIP4	-0.702476	3.53184	4.9701	1.5986e-06	2.18201e-05	4.68351
NBEA	0.893447	1.10343	-4.96992	1.59989e-06	2.18224e-05	4.68273
DUOX2	-1.56917	3.68872	4.96898	1.60672e-06	2.19002e-05	4.67866
UGT2B7	1.27283	1.05942	-4.96505	1.63549e-06	2.22298e-05	4.66171
DAPP1	-0.796675	4.03761	4.96098	1.66571e-06	2.26248e-05	4.64422
SPINK2	-0.607247	0.896927	4.95384	1.72019e-06	2.33025e-05	4.61349
CYP2S1	-1.5361	4.8613	4.94775	1.76795e-06	2.38963e-05	4.58733
C4B	0.918264	1.59352	-4.94756	1.7695e-06	2.39006e-05	4.5865
EN1	-1.0795	1.25141	4.94624	1.78002e-06	2.40259e-05	4.58084
RNASE4	0.595983	1.24497	-4.94565	1.78475e-06	2.40571e-05	4.5783
NXPH4	-1.23189	4.91506	4.94522	1.78818e-06	2.40858e-05	4.57647
CPA6	-1.02726	1.16627	4.94274	1.80823e-06	2.43389e-05	4.56582
USH1C	1.20657	0.833295	-4.94167	1.81701e-06	2.44401e-05	4.5612
METAP1	-0.587068	5.99629	4.94106	1.82192e-06	2.44893e-05	4.55862
CCDC187	0.855182	0.841458	-4.94089	1.82335e-06	2.44915e-05	4.55787
WDR47	-0.63536	3.93321	4.93843	1.84364e-06	2.47468e-05	4.5473
SGCE	1.14341	3.25436	-4.93599	1.86395e-06	2.4985e-05	4.53684
KRT10	-1.15755	6.83485	4.93549	1.86815e-06	2.50239e-05	4.53469
MSI2	0.629646	3.31628	-4.93349	1.88501e-06	2.52324e-05	4.52611
APOBEC1	0.596555	0.294815	-4.93055	1.91001e-06	2.55494e-05	4.51353
CLEC10A	-0.921778	2.33311	4.9288	1.92506e-06	2.56975e-05	4.50604
SH3RF1	0.706426	3.87634	-4.92857	1.92703e-06	2.57061e-05	4.50507
CCDC153	0.655341	2.18128	-4.92436	1.96381e-06	2.61608e-05	4.48701
DYNAP	-0.726244	0.516704	4.92304	1.97541e-06	2.62972e-05	4.48139
NCCRP1	-1.8518	5.56185	4.92263	1.97909e-06	2.63281e-05	4.47962
CHI3L1	-1.3466	5.10431	4.92191	1.98545e-06	2.63766e-05	4.47655
NKPD1	-0.611882	1.26218	4.92016	2.00114e-06	2.65668e-05	4.46904
C20orf85	1.09869	0.710787	-4.91952	2.00686e-06	2.66245e-05	4.46631
NEIL1	0.704082	2.59172	-4.91664	2.03291e-06	2.68781e-05	4.45401
PLCD1	-0.696938	4.0743	4.90923	2.10145e-06	2.77277e-05	4.42235
NFE2L2	-0.70156	6.86687	4.90842	2.10915e-06	2.77987e-05	4.41886
PABPC1L	0.749228	4.25457	-4.90711	2.12153e-06	2.79356e-05	4.41328
SERPINB4	-2.13476	6.46577	4.90624	2.12979e-06	2.80254e-05	4.40957
GALNT12	1.10527	4.22879	-4.90497	2.14192e-06	2.81609e-05	4.40415
STXBP6	1.10538	1.16517	-4.90329	2.15807e-06	2.83303e-05	4.39698
EGFR	-0.995492	5.14575	4.90321	2.1588e-06	2.83303e-05	4.39665
SLC38A3	0.654331	0.725953	-4.89506	2.23891e-06	2.9322e-05	4.36188
GLIS2	0.91107	4.04078	-4.89299	2.25966e-06	2.95738e-05	4.35308
ALDH1B1	0.714688	4.89877	-4.8907	2.28285e-06	2.98382e-05	4.34333
SPINK7	-1.29342	1.20947	4.88884	2.30188e-06	3.00165e-05	4.33541
ALDH7A1	1.09486	4.79037	-4.88861	2.30432e-06	3.00165e-05	4.3344
SLC39A4	0.692751	4.39243	-4.88742	2.31655e-06	3.01555e-05	4.32935
ALG1L	-1.06039	5.87093	4.88655	2.32556e-06	3.02526e-05	4.32565
C4BPA	1.55633	1.29784	-4.88517	2.33988e-06	3.04185e-05	4.31979
KRT75	-1.61089	2.6985	4.88499	2.3418e-06	3.0423e-05	4.31901
ATP6V1C2	1.06377	2.86651	-4.88279	2.3649e-06	3.0682e-05	4.30964
PLEKHG5	-0.687687	4.50333	4.88183	2.37498e-06	3.07923e-05	4.30558
PCTP	0.71003	3.26576	-4.87627	2.43461e-06	3.14635e-05	4.28193
QRFPR	-0.901796	0.675214	4.87618	2.4355e-06	3.14635e-05	4.28158
MDH1B	0.639716	1.13512	-4.87503	2.44808e-06	3.15921e-05	4.27666
SSC4D	1.04044	2.38869	-4.87432	2.45581e-06	3.16708e-05	4.27365
HOXA9	-1.13156	3.67908	4.87334	2.46648e-06	3.17873e-05	4.26952
DEPTOR	1.35219	3.68669	-4.87301	2.47016e-06	3.18136e-05	4.2681
LCE3E	-1.29397	1.32503	4.87013	2.50202e-06	3.21305e-05	4.25587
C15orf65	0.60852	2.59479	-4.86792	2.52675e-06	3.24133e-05	4.24649
CCDC177	-0.679527	1.12314	4.86747	2.53178e-06	3.24184e-05	4.24459
PHLDA3	-0.602685	6.81346	4.86744	2.53216e-06	3.24184e-05	4.24445
PGGHG	1.118	5.80039	-4.86458	2.56454e-06	3.27748e-05	4.23233
COL18A1	0.799783	5.59665	-4.86457	2.56472e-06	3.27748e-05	4.23226
RANBP17	0.633854	1.71646	-4.86454	2.56507e-06	3.27748e-05	4.23213
ANKRD18B	-0.657533	1.39578	4.86382	2.57325e-06	3.28577e-05	4.22909
PHLDB1	0.677387	2.37178	-4.85875	2.6319e-06	3.35623e-05	4.2076
RYR1	-0.993385	3.14565	4.85793	2.64153e-06	3.36409e-05	4.20411
KIAA1324	1.66654	2.84545	-4.85762	2.64511e-06	3.36644e-05	4.20282
ZNF608	0.957903	1.4338	-4.85381	2.69027e-06	3.41835e-05	4.18667
IL34	-1.00798	2.93916	4.85376	2.6909e-06	3.41835e-05	4.18645
SMTNL2	0.837656	0.736578	-4.84998	2.7364e-06	3.4735e-05	4.17046
RTL8B	-0.638424	5.26238	4.8496	2.74097e-06	3.47703e-05	4.16887
MICAL2	0.748778	3.03174	-4.84814	2.75882e-06	3.49739e-05	4.16268
ANKRD29	-0.795021	2.08075	4.84711	2.7714e-06	3.51104e-05	4.15834
KPRP	-0.718275	0.679647	4.84478	2.80022e-06	3.54524e-05	4.14847
DOCK5	0.613804	2.93477	-4.84361	2.81475e-06	3.55899e-05	4.14354
TMC8	-0.722242	3.83657	4.84283	2.82452e-06	3.56901e-05	4.14023
SLC12A2	0.810056	3.34676	-4.84187	2.83658e-06	3.58193e-05	4.13617
SLC27A1	0.585388	3.34279	-4.84001	2.86009e-06	3.60724e-05	4.1283
ELK3	-0.636689	5.47872	4.83898	2.87312e-06	3.62099e-05	4.12397
SULT1C2	0.694686	0.653691	-4.83855	2.87863e-06	3.62323e-05	4.12214
ADGRG2	0.725346	0.724963	-4.83796	2.8861e-06	3.62793e-05	4.11967
IKZF1	-0.675712	2.22509	4.83695	2.89902e-06	3.63944e-05	4.11541
ZNF254	0.758073	1.76548	-4.83645	2.90545e-06	3.64516e-05	4.11329
FAM102A	-0.586215	5.91066	4.83537	2.91949e-06	3.65803e-05	4.1087
COL7A1	-1.1539	6.30355	4.83403	2.93678e-06	3.67733e-05	4.10307
GPD1	0.681886	0.952539	-4.83234	2.95882e-06	3.70014e-05	4.09594
AHNAK2	-1.08511	4.07422	4.8322	2.96074e-06	3.70016e-05	4.09532
MITF	0.669144	2.29559	-4.83083	2.97866e-06	3.72016e-05	4.08957
NSUN7	0.824443	2.3232	-4.829	3.00287e-06	3.74798e-05	4.08185
RADX	-0.897162	1.84729	4.82876	3.00615e-06	3.74966e-05	4.08081
RFLNA	1.05058	1.34906	-4.82796	3.0168e-06	3.75812e-05	4.07744
B4GALT1	0.609492	7.72171	-4.82657	3.03536e-06	3.77637e-05	4.07159
TSPAN15	0.692076	6.09171	-4.82643	3.0373e-06	3.77637e-05	4.07098
AATK	0.616611	1.26021	-4.82584	3.04517e-06	3.78373e-05	4.06851
LEFTY1	1.00512	0.753826	-4.82544	3.0506e-06	3.78806e-05	4.06681
MUC1	1.31086	7.42282	-4.8247	3.06054e-06	3.79797e-05	4.06371
CBR3	-0.90483	5.73623	4.82287	3.08544e-06	3.82153e-05	4.05599
KCNK3	0.601535	0.775479	-4.81701	3.16632e-06	3.90674e-05	4.03132
CRNN	-1.99665	2.05152	4.80932	3.2756e-06	4.02876e-05	3.99898
IHH	0.821486	0.557338	-4.80826	3.29099e-06	4.04265e-05	3.99451
TUBB6	-1.0049	6.5926	4.80566	3.32891e-06	4.08139e-05	3.98359
SLC9A3R1	-0.705988	8.52677	4.8042	3.35043e-06	4.10517e-05	3.97745
ZBTB7C	-1.16176	4.05324	4.80324	3.36461e-06	4.11995e-05	3.97342
DYDC2	0.809892	1.0094	-4.7991	3.42661e-06	4.19058e-05	3.95602
EFHD1	1.15595	3.0814	-4.79828	3.43891e-06	4.20297e-05	3.95261
LAMP3	-0.921102	5.48348	4.79718	3.45573e-06	4.21572e-05	3.94796
CYSRT1	-1.08446	4.10819	4.79717	3.45586e-06	4.21572e-05	3.94792
TSPOAP1	0.809434	2.55162	-4.79555	3.48062e-06	4.24059e-05	3.94112
CLIC6	1.82775	3.49456	-4.79136	3.54542e-06	4.30601e-05	3.92354
SAA2	1.29774	2.96231	-4.79051	3.55867e-06	4.31636e-05	3.91998
GJB3	-1.05124	6.78596	4.79032	3.56158e-06	4.31636e-05	3.91921
CEMIP2	0.752948	3.99633	-4.79024	3.56284e-06	4.31636e-05	3.91887
PPP2R2C	-1.20608	2.38787	4.78994	3.56759e-06	4.31942e-05	3.9176
ERICH3	0.614088	0.334051	-4.7894	3.57613e-06	4.32705e-05	3.91532
SOX21	-1.48239	3.18815	4.7889	3.58386e-06	4.3337e-05	3.91326
CD86	-0.732843	3.2699	4.78851	3.59004e-06	4.33847e-05	3.91162
OSBP2	0.902115	3.10339	-4.78779	3.60144e-06	4.34954e-05	3.9086
WNT4	-0.971644	3.49583	4.78577	3.63354e-06	4.38284e-05	3.90015
TEF	-0.60755	4.32555	4.78381	3.66499e-06	4.41529e-05	3.89193
KCNK15	0.801026	1.79237	-4.78223	3.69049e-06	4.4405e-05	3.88533
PNMT	1.11773	1.11685	-4.77872	3.74788e-06	4.4956e-05	3.87063
CARD18	-0.720636	0.568454	4.77633	3.78739e-06	4.53741e-05	3.86064
CD320	0.637363	5.55881	-4.77224	3.85598e-06	4.60533e-05	3.84354
CCDC96	0.604565	2.65282	-4.77002	3.89378e-06	4.64475e-05	3.83424
CRCT1	-1.88556	2.66993	4.76701	3.94554e-06	4.6892e-05	3.82166
ELFN2	0.625732	0.592036	-4.76556	3.97064e-06	4.71614e-05	3.81562
LCE3D	-1.7143	1.85831	4.76386	4.00046e-06	4.74284e-05	3.8085
TAGAP	-0.703283	2.47971	4.76332	4.00993e-06	4.75116e-05	3.80624
TLX3	-1.17812	1.891	4.7592	4.08287e-06	4.82874e-05	3.78907
SCGB3A1	1.57247	1.86491	-4.75582	4.14382e-06	4.89188e-05	3.77496
CFAP100	0.719248	0.592315	-4.75331	4.18942e-06	4.93509e-05	3.76454
SLC43A3	0.654908	5.0726	-4.75325	4.1906e-06	4.93509e-05	3.76427
ADAMDEC1	-1.14094	2.9867	4.74975	4.25529e-06	4.99308e-05	3.74968
ITGA1	0.649642	2.59507	-4.74763	4.29484e-06	5.03643e-05	3.74087
TNNI3	1.14983	2.21945	-4.7469	4.30869e-06	5.04658e-05	3.7378
RAB38	-1.07012	5.31271	4.74257	4.39097e-06	5.13984e-05	3.71979
HPN	1.16045	1.35816	-4.74083	4.42439e-06	5.17272e-05	3.71257
STK26	-0.807348	4.75276	4.74055	4.4298e-06	5.17281e-05	3.71141
SERPINH1	0.616822	7.22002	-4.74019	4.43688e-06	5.17796e-05	3.70989
ANXA1	-0.985469	9.0687	4.73706	4.49791e-06	5.23973e-05	3.69688
SLC3A1	0.777293	0.452599	-4.7366	4.50694e-06	5.24669e-05	3.69497
CAPN5	1.24608	3.21531	-4.73648	4.5093e-06	5.24669e-05	3.69447
SLC6A11	-1.04652	1.91228	4.73579	4.52293e-06	5.2594e-05	3.6916
GPSM2	-0.629468	4.32484	4.7356	4.52667e-06	5.2606e-05	3.69081
TGFB1I1	0.727104	3.62906	-4.73469	4.54468e-06	5.27836e-05	3.68703
RARRES1	1.67177	5.24857	-4.72935	4.65172e-06	5.39148e-05	3.66486
GLRX	0.659189	3.53319	-4.72924	4.65396e-06	5.39148e-05	3.66441
CADPS2	0.74273	3.64377	-4.72914	4.65597e-06	5.39148e-05	3.66399
ARFGEF3	0.999762	2.29642	-4.72786	4.68211e-06	5.4185e-05	3.65867
FBP1	1.13844	5.06296	-4.7241	4.75938e-06	5.49677e-05	3.64308
CASK	-0.597673	4.39961	4.72027	4.83944e-06	5.57397e-05	3.6272
FAM25A	-1.36145	2.06809	4.71909	4.8643e-06	5.59928e-05	3.62232
TESMIN	0.623265	2.10461	-4.71728	4.90293e-06	5.63707e-05	3.61479
SSTR1	0.740772	0.52327	-4.71538	4.9435e-06	5.67734e-05	3.60695
TFF2	1.29782	0.920654	-4.71406	4.972e-06	5.70633e-05	3.60148
S100A16	-0.706201	9.98565	4.71302	4.99456e-06	5.72544e-05	3.59717
SLC43A1	0.617302	2.06539	-4.71229	5.0105e-06	5.73694e-05	3.59414
EFCC1	0.721889	1.5422	-4.71144	5.02901e-06	5.75473e-05	3.59063
HSPA2	-1.12164	5.09794	4.70968	5.06752e-06	5.79197e-05	3.58337
EFNA3	-0.878814	4.52704	4.70728	5.12078e-06	5.8494e-05	3.57341
CDKN1A	-0.639289	8.38211	4.70073	5.26852e-06	6.00048e-05	3.54635
OSBPL7	0.633945	3.29701	-4.69898	5.30869e-06	6.04268e-05	3.53912
MYEF2	0.795493	0.863737	-4.69632	5.37046e-06	6.10225e-05	3.52811
STX1A	0.670219	2.92229	-4.68725	5.58584e-06	6.32475e-05	3.4907
CCR4	-0.617469	1.37097	4.68577	5.6217e-06	6.36164e-05	3.48461
EFNB1	-0.806872	6.97899	4.68487	5.64362e-06	6.38272e-05	3.4809
ACADL	0.716066	0.787685	-4.68409	5.66281e-06	6.40069e-05	3.47767
LRRC8A	-0.655467	6.74405	4.68268	5.69744e-06	6.43234e-05	3.47187
CLCN4	0.780797	1.74901	-4.68144	5.72807e-06	6.46315e-05	3.46677
FBN3	0.744599	0.508255	-4.6805	5.75151e-06	6.47927e-05	3.46289
SLC45A3	0.77523	2.56516	-4.67892	5.7908e-06	6.51121e-05	3.45641
COPZ2	-0.89317	4.72633	4.67836	5.80508e-06	6.51775e-05	3.45407
FGFR1	1.03667	3.00299	-4.67829	5.8067e-06	6.51775e-05	3.4538
DLX5	-1.32631	2.92534	4.6745	5.90268e-06	6.61783e-05	3.43821
CECR2	-0.861716	1.06334	4.67432	5.90721e-06	6.61908e-05	3.43748
CBR1	-0.64727	7.05743	4.67381	5.92047e-06	6.62733e-05	3.43534
TGIF2	0.653736	4.99343	-4.67295	5.94235e-06	6.6431e-05	3.43184
LONRF3	0.602298	1.3107	-4.6704	6.00831e-06	6.70911e-05	3.42134
CLEC2A	-1.08677	0.833503	4.66726	6.09024e-06	6.79403e-05	3.40845
SAA4	0.710394	1.2043	-4.66722	6.09137e-06	6.79403e-05	3.40828
TNFRSF25	-0.597118	4.70233	4.66231	6.22185e-06	6.91967e-05	3.38812
CLEC12A	-0.657618	1.24357	4.66195	6.2315e-06	6.92643e-05	3.38664
SCN1B	0.612403	1.68191	-4.65869	6.31998e-06	7.01673e-05	3.37324
GFOD1	-0.593662	3.03698	4.65628	6.38601e-06	7.07789e-05	3.36335
C11orf16	0.590012	0.60824	-4.65579	6.39952e-06	7.08881e-05	3.36134
SLC39A5	0.700479	0.601292	-4.64992	6.56335e-06	7.24546e-05	3.3373
ITPKC	-0.646257	6.78046	4.64506	6.70227e-06	7.39041e-05	3.31739
TRIM54	1.27138	1.5844	-4.64412	6.72935e-06	7.41605e-05	3.31355
CREB3L1	1.39542	3.64043	-4.6429	6.76476e-06	7.44661e-05	3.30856
ST6GAL1	1.15312	4.48107	-4.64034	6.83978e-06	7.51639e-05	3.29808
SYNE4	1.01884	3.33178	-4.64016	6.84525e-06	7.51814e-05	3.29732
BBOX1	-1.01154	2.10643	4.63996	6.85102e-06	7.52023e-05	3.29652
CEP19	-0.716809	3.3143	4.63424	7.02161e-06	7.69007e-05	3.27313
NOTCH2	-0.632279	4.75472	4.62826	7.20432e-06	7.86796e-05	3.24871
TM4SF4	1.36664	0.800097	-4.62717	7.2382e-06	7.89607e-05	3.24425
KANK1	-0.649493	3.45838	4.62611	7.27127e-06	7.91878e-05	3.23992
CACFD1	0.588199	4.72832	-4.62591	7.27748e-06	7.9211e-05	3.23911
SLC13A2	0.815997	0.657612	-4.62489	7.30934e-06	7.94241e-05	3.23496
SNX20	-0.654527	2.31692	4.61496	7.62753e-06	8.265e-05	3.19446
CCDC113	0.714526	1.8458	-4.61469	7.63621e-06	8.26979e-05	3.19338
GYG2	0.990198	2.13289	-4.61332	7.68127e-06	8.31395e-05	3.18778
PRR15L	1.49874	4.92588	-4.61273	7.70054e-06	8.33016e-05	3.1854
PLEK	-0.838269	3.93295	4.61189	7.72827e-06	8.35549e-05	3.18199
MSN	-0.806196	7.62189	4.61078	7.76537e-06	8.39092e-05	3.17744
GCK	-0.88766	1.2297	4.60983	7.79676e-06	8.41547e-05	3.1736
ZNF532	-0.61205	4.27847	4.60777	7.86606e-06	8.47611e-05	3.16519
NEDD9	0.885306	3.64638	-4.60749	7.87534e-06	8.4814e-05	3.16407
NLRP1	-0.671147	3.11309	4.60687	7.89623e-06	8.49918e-05	3.16156
DACH1	0.964149	1.4074	-4.60548	7.9434e-06	8.54047e-05	3.1559
FGL1	0.667672	0.432707	-4.60451	7.97661e-06	8.56669e-05	3.15193
NCKAP1L	-0.682241	2.73513	4.60423	7.9861e-06	8.57213e-05	3.1508
CD84	-0.671999	1.92143	4.60284	8.03378e-06	8.60901e-05	3.14515
SLIT2	0.793825	1.41597	-4.59961	8.14552e-06	8.71913e-05	3.13202
TGM5	-0.942239	1.70845	4.59655	8.25252e-06	8.81906e-05	3.11962
SIPA1L2	-0.777484	3.98931	4.59472	8.31739e-06	8.88348e-05	3.11218
C20orf96	0.674775	4.02079	-4.59083	8.45669e-06	9.00746e-05	3.0964
AIF1L	0.833815	4.2209	-4.59001	8.48642e-06	9.03417e-05	3.09307
DAPL1	-1.73147	3.94946	4.58929	8.51264e-06	9.05215e-05	3.09014
PLEKHA4	0.748117	5.01484	-4.58491	8.67319e-06	9.21782e-05	3.07239
EIF5A2	-0.747604	2.46051	4.58045	8.83963e-06	9.38443e-05	3.05433
CHN1	0.666311	2.35032	-4.57943	8.87839e-06	9.42042e-05	3.05018
RASD1	1.28464	3.96928	-4.57872	8.9052e-06	9.43339e-05	3.04731
CFAP300	0.824343	1.89072	-4.57815	8.92703e-06	9.45135e-05	3.04499
NUPR1	-0.907636	5.84649	4.57669	8.98256e-06	9.49459e-05	3.0391
BTBD3	0.723629	4.49768	-4.57472	9.0584e-06	9.56433e-05	3.03111
VSIG2	1.38496	2.81241	-4.57414	9.08081e-06	9.58278e-05	3.02877
TIMP2	0.794659	6.33625	-4.57207	9.16118e-06	9.66233e-05	3.0204
NRARP	-0.824792	5.06397	4.56863	9.29635e-06	9.78893e-05	3.00649
RPS6KA2	0.755201	3.23689	-4.56766	9.3345e-06	9.82377e-05	3.0026
CDON	0.622633	1.64525	-4.56585	9.40662e-06	9.89429e-05	2.99529
MACROD1	0.590473	5.32247	-4.56252	9.54086e-06	0.000100246	2.98183
MTURN	0.722819	3.36635	-4.56141	9.58608e-06	0.000100667	2.97734
TDGF1	0.590692	0.359191	-4.56074	9.61337e-06	0.000100844	2.97464
SEC14L6	0.596348	0.684381	-4.55772	9.73755e-06	0.000101981	2.96246
AFAP1	0.635222	3.7528	-4.5461	1.02299e-05	0.000106619	2.91563
RPRML	0.640132	0.445454	-4.54442	1.03031e-05	0.00010721	2.90886
CACNA1D	0.646268	1.00348	-4.54319	1.0357e-05	0.000107655	2.9039
C12orf56	-0.819402	1.59135	4.53928	1.05301e-05	0.000109278	2.88818
IL12A	0.723282	1.40045	-4.53765	1.06029e-05	0.000109901	2.88163
GSTA4	-1.00481	3.98532	4.53151	1.08819e-05	0.000112568	2.85698
ADCY6	0.634902	4.23687	-4.53092	1.09093e-05	0.000112731	2.8546
JAK2	-0.663951	3.73217	4.53044	1.09313e-05	0.000112898	2.85268
DNAJC15	0.970238	3.40023	-4.52468	1.1201e-05	0.00011529	2.82955
RFX3	0.592557	1.98776	-4.5246	1.12045e-05	0.00011529	2.82925
CXXC5	0.819996	5.5052	-4.51952	1.1448e-05	0.000117484	2.80885
MEST	0.758139	5.37699	-4.51849	1.14978e-05	0.000117933	2.80473
LRRC26	0.788566	0.918484	-4.51651	1.1594e-05	0.000118794	2.79683
NCF1	-0.595678	1.83074	4.51608	1.16154e-05	0.000118951	2.79508
WNT9A	-0.778901	3.58798	4.51367	1.17342e-05	0.000119977	2.78542
PGM2L1	0.81067	3.18625	-4.51316	1.17594e-05	0.000120172	2.78339
BPIFA1	1.01752	0.670156	-4.51262	1.17862e-05	0.000120382	2.78123
CYP2B6	0.602923	0.345424	-4.51054	1.18897e-05	0.000121375	2.77293
VSTM2L	1.16938	2.0395	-4.50956	1.1939e-05	0.000121814	2.76901
PRRT4	-0.780518	1.40818	4.50913	1.19609e-05	0.000121909	2.76727
PER3	-0.803319	4.02101	4.50492	1.21749e-05	0.000123948	2.75044
S100A6	0.733827	11.8524	-4.50337	1.22546e-05	0.000124574	2.74426
ZDHHC11B	-0.718791	1.38455	4.50312	1.22677e-05	0.000124578	2.74325
PIWIL1	0.660067	0.461469	-4.49935	1.2464e-05	0.000126373	2.72818
SIX4	0.889104	2.97366	-4.49829	1.25199e-05	0.000126873	2.72394
PBLD	0.636577	2.22002	-4.49596	1.26432e-05	0.000127989	2.71464
ACE	0.637914	2.49444	-4.49042	1.29412e-05	0.000130801	2.69255
TMEM255A	-0.791025	1.63494	4.48933	1.30004e-05	0.000131331	2.68822
CA2	-1.22556	5.31652	4.48763	1.30934e-05	0.000132133	2.68146
EHD3	-0.758722	3.3255	4.48718	1.31186e-05	0.000132319	2.67963
SMOX	0.755793	4.35219	-4.48641	1.31611e-05	0.000132679	2.67656
HSH2D	0.812402	3.6226	-4.48374	1.33096e-05	0.000134036	2.66592
EPHA2	-0.841134	6.94035	4.48309	1.33456e-05	0.000134329	2.66336
SYK	-0.701882	5.46867	4.48148	1.34361e-05	0.000135169	2.65696
DLL1	0.949431	3.69863	-4.4808	1.34748e-05	0.000135488	2.65423
ENKD1	0.647096	4.42315	-4.47813	1.36263e-05	0.000136742	2.64363
PLXNB3	-0.794181	2.63206	4.47559	1.37724e-05	0.000138051	2.63352
MOCS1	0.782561	2.00734	-4.47547	1.37796e-05	0.000138052	2.63302
CTNND1	-0.587559	7.44132	4.47327	1.39073e-05	0.00013926	2.62427
INHA	0.76715	1.05708	-4.47101	1.40395e-05	0.000140366	2.61531
SLC49A3	0.680824	3.12694	-4.46855	1.41851e-05	0.000141675	2.60552
CGN	0.942682	4.62926	-4.46229	1.45617e-05	0.000145064	2.58068
PROS1	-0.933638	3.55729	4.46008	1.46969e-05	0.000146261	2.57192
DOK4	0.59397	4.37359	-4.45804	1.48229e-05	0.000147363	2.56383
OAS2	-0.861464	5.99891	4.45511	1.50058e-05	0.000149104	2.55221
CBFA2T3	-0.615861	1.93787	4.4529	1.51449e-05	0.000150102	2.54346
CDC42EP5	0.962425	4.82809	-4.45158	1.52288e-05	0.000150779	2.53822
FAM240C	-0.722307	1.31749	4.45116	1.52551e-05	0.000150963	2.53659
PRRT3	0.610201	2.13604	-4.45095	1.52688e-05	0.000151022	2.53574
LIPM	-0.653748	1.9095	4.4491	1.53873e-05	0.000151884	2.52841
AHNAK	-0.609269	7.18142	4.44587	1.55963e-05	0.00015379	2.51562
MACROD2	0.728969	1.21916	-4.44214	1.58408e-05	0.000155964	2.50088
SLC44A3	0.697739	4.20033	-4.43779	1.61306e-05	0.000158254	2.48371
GALM	0.832449	4.7559	-4.43494	1.6323e-05	0.00015998	2.47247
ONECUT2	0.702837	1.03993	-4.43354	1.64189e-05	0.000160758	2.46692
BCL2L15	1.17966	1.93523	-4.43322	1.6441e-05	0.000160893	2.46564
FOXC2	1.0481	1.53381	-4.43155	1.65554e-05	0.000161837	2.45907
RIBC1	0.673857	2.00545	-4.43145	1.65625e-05	0.000161837	2.45867
MYO1A	0.727943	0.683715	-4.43037	1.66368e-05	0.000162399	2.45443
HMGB3	0.586851	6.77271	-4.42868	1.67545e-05	0.000163302	2.44775
IGFBP3	1.14236	7.53594	-4.4247	1.70341e-05	0.000165574	2.43207
SYBU	0.851047	2.20891	-4.4222	1.72122e-05	0.000167091	2.42222
DCAF12L1	0.677501	0.333111	-4.4204	1.73412e-05	0.000168259	2.41514
MUC15	-1.17835	2.18682	4.41998	1.7372e-05	0.000168339	2.41346
SPINK4	0.618727	0.622578	-4.41589	1.76693e-05	0.000170708	2.39739
GBP5	-1.25591	4.03982	4.41059	1.80624e-05	0.000174038	2.37655
CACNA2D3	-0.787787	1.45843	4.4095	1.8145e-05	0.000174747	2.37223
SMIM1	0.65841	1.66903	-4.40761	1.82872e-05	0.000175788	2.36483
CD36	-0.873411	1.4099	4.40647	1.83745e-05	0.000176382	2.36032
ANKRD22	-0.828636	5.22307	4.40621	1.8394e-05	0.000176382	2.35932
ACP5	-0.702949	6.01005	4.40591	1.8417e-05	0.00017649	2.35813
KLHDC8A	0.798278	1.02205	-4.40547	1.84509e-05	0.000176727	2.3564
CD1E	-0.802335	1.72909	4.40483	1.84992e-05	0.000177103	2.35392
CSF1R	-0.768552	4.29076	4.40308	1.86339e-05	0.000178041	2.34705
PYCR1	0.672722	5.54973	-4.40174	1.87378e-05	0.000178858	2.34178
OAS3	-0.730984	6.17365	4.4016	1.87487e-05	0.000178873	2.34123
TLR8	-0.61575	1.22425	4.39802	1.90287e-05	0.000181456	2.32719
CIART	-0.640358	3.42662	4.39419	1.9333e-05	0.000183725	2.31217
C1orf21	-0.667776	4.25248	4.39122	1.95726e-05	0.000185729	2.30051
CDC42BPA	0.66936	3.5233	-4.39087	1.96007e-05	0.000185905	2.29915
SNTB1	0.792997	2.19968	-4.38977	1.96903e-05	0.000186663	2.29484
CCDC74B	0.703092	1.40037	-4.38909	1.97454e-05	0.000187003	2.29219
INPP5J	0.721809	2.43459	-4.38671	1.99411e-05	0.000188672	2.28285
SLC27A2	0.927142	3.10762	-4.38026	2.04796e-05	0.000193484	2.25763
NEURL1	-0.981455	2.26248	4.37995	2.05053e-05	0.000193632	2.25644
MALL	-1.01781	3.31379	4.37528	2.09045e-05	0.000197019	2.23819
ITM2C	0.879017	6.58868	-4.37325	2.10805e-05	0.000198484	2.23026
TMEM211	0.78503	0.834101	-4.37306	2.10972e-05	0.000198545	2.22951
LRMP	-0.775103	1.98964	4.3681	2.15327e-05	0.00020186	2.21017
HOXB6	1.33125	3.75076	-4.36797	2.15449e-05	0.000201876	2.20964
FCHO1	0.696754	2.6938	-4.36762	2.15759e-05	0.00020194	2.20827
C2CD4A	0.852316	2.22712	-4.36754	2.15829e-05	0.00020194	2.20797
CD1C	-0.807822	2.15715	4.36331	2.19625e-05	0.000204997	2.19147
METRN	0.777689	3.71655	-4.36117	2.21561e-05	0.000206605	2.18316
H2AFY2	-1.01808	5.67988	4.35992	2.22704e-05	0.000207472	2.17829
KAZALD1	0.838805	3.04369	-4.35636	2.25995e-05	0.000210208	2.16442
TNS3	0.697313	3.8995	-4.35596	2.2637e-05	0.000210282	2.16284
TSPAN7	-1.11089	2.88611	4.35109	2.30946e-05	0.000214122	2.14391
FPR3	-0.812128	3.79175	4.34894	2.32994e-05	0.000215711	2.13556
ADGRA3	0.72693	3.3328	-4.34824	2.33663e-05	0.000216228	2.13285
LRRC6	0.779688	2.07076	-4.34505	2.36749e-05	0.000218562	2.12044
RND1	0.728122	2.62401	-4.34426	2.37518e-05	0.000219063	2.11737
ULBP2	-0.969678	4.73022	4.34221	2.39521e-05	0.000220805	2.10943
CLIP2	0.586565	3.23386	-4.34167	2.40056e-05	0.000221194	2.10731
IL36A	-1.18662	1.17365	4.34154	2.40184e-05	0.000221206	2.10681
FZD8	0.97577	3.00262	-4.3413	2.40424e-05	0.000221322	2.10587
OBSL1	0.929868	3.74715	-4.34018	2.4153e-05	0.000222129	2.10153
KCNQ1	0.971427	3.61712	-4.34006	2.41647e-05	0.000222132	2.10107
ZNF239	0.676417	2.11838	-4.33576	2.45947e-05	0.00022555	2.08438
ALDH3A1	-1.45087	4.8967	4.33465	2.47068e-05	0.000226472	2.08008
IP6K3	0.951525	1.17256	-4.33421	2.47513e-05	0.000226558	2.07838
QPCT	0.869222	3.11652	-4.33246	2.49289e-05	0.000227861	2.07162
FAM131C	-0.667735	1.68419	4.33104	2.50745e-05	0.00022876	2.06611
SREBF1	-0.605871	6.79932	4.32925	2.52596e-05	0.000230142	2.05916
PCSK1N	1.18259	1.78658	-4.32748	2.54431e-05	0.000231362	2.05231
DYNLT3	-0.593265	5.48139	4.32635	2.55609e-05	0.000232215	2.04795
CCL17	-0.823355	2.76067	4.32412	2.57949e-05	0.000234122	2.03933
MGAT5B	0.598278	0.908194	-4.32042	2.61892e-05	0.000237035	2.02498
KCNH2	0.892029	1.29675	-4.31716	2.65403e-05	0.000239971	2.01239
PAPSS2	0.79867	3.82107	-4.31706	2.65508e-05	0.000239971	2.01202
SLC2A9	-0.705094	2.60316	4.31405	2.68795e-05	0.000242491	2.00038
POU2AF1	-0.815264	2.25665	4.31361	2.69274e-05	0.00024281	1.9987
TLE6	0.65911	1.33486	-4.31228	2.7074e-05	0.000243905	1.99357
CCL28	0.71829	3.60878	-4.31041	2.72819e-05	0.00024555	1.98634
GJC2	0.613437	1.89134	-4.30872	2.74706e-05	0.000247019	1.97982
TMEM47	0.948311	2.81432	-4.30674	2.7694e-05	0.000248797	1.97217
BRSK1	0.610947	1.54044	-4.30304	2.81145e-05	0.000252191	1.95792
MPP7	-0.782674	3.83731	4.29906	2.85744e-05	0.000255877	1.94258
PLSCR4	-0.831566	3.92482	4.29457	2.91016e-05	0.000259997	1.92531
PARP9	-0.586278	5.74516	4.29442	2.91192e-05	0.000260016	1.92474
FZD9	-0.729876	1.5526	4.29433	2.91305e-05	0.000260016	1.92437
SHOX2	-0.728451	2.12806	4.29367	2.92089e-05	0.0002604	1.92183
LLGL2	0.617021	5.84147	-4.29363	2.92138e-05	0.0002604	1.92167
EPHB6	-0.840824	3.87423	4.29314	2.92719e-05	0.000260746	1.91979
APBB1IP	-0.670647	2.83031	4.29307	2.92802e-05	0.000260746	1.91953
GATA4	0.589391	0.387504	-4.29094	2.95346e-05	0.000262656	1.91135
MUC21	-1.449	2.28911	4.28968	2.96873e-05	0.000263893	1.90648
GHR	-0.723958	1.14228	4.28898	2.97715e-05	0.000264521	1.9038
GJB4	-0.9795	3.54126	4.2854	3.02087e-05	0.000267792	1.89003
PKDCC	1.27018	2.8895	-4.28469	3.0296e-05	0.000268443	1.8873
PRXL2B	0.589368	5.00882	-4.28314	3.04871e-05	0.000269766	1.88136
CD200R1	-0.586555	1.24187	4.2811	3.07405e-05	0.000271761	1.87354
RBP4	1.06092	1.35915	-4.27824	3.10999e-05	0.000274626	1.86256
ALDH4A1	-0.60426	4.90795	4.27811	3.11164e-05	0.000274626	1.86206
NPW	1.17045	2.58538	-4.27638	3.1335e-05	0.000275885	1.85544
CWH43	-1.03821	1.12942	4.27344	3.17115e-05	0.000278946	1.84416
TSKS	-0.614646	0.670347	4.273	3.17688e-05	0.000279324	1.84245
PLXNA2	-0.67746	3.99855	4.27237	3.18499e-05	0.000279783	1.84005
MPV17L	0.958832	1.71692	-4.27168	3.19394e-05	0.000280189	1.8374
KRT4	-2.12977	4.8834	4.27109	3.20154e-05	0.000280602	1.83515
SPN	-0.616205	2.38911	4.26906	3.22806e-05	0.000282415	1.82736
SPI1	-0.719842	4.91167	4.26814	3.2401e-05	0.000283213	1.82384
ENTPD2	0.91233	3.27361	-4.26605	3.26757e-05	0.000284972	1.81587
CACNB1	0.606489	2.40007	-4.26534	3.27699e-05	0.000285665	1.81315
PDE4D	0.655571	2.34629	-4.26499	3.28161e-05	0.000285811	1.81182
ARSF	-0.682728	0.834777	4.26422	3.29186e-05	0.000286287	1.80887
KRTDAP	-1.91515	3.02163	4.26414	3.29297e-05	0.000286287	1.80855
PACRG	0.594678	0.640358	-4.2637	3.29886e-05	0.00028667	1.80687
FAM81A	0.74624	2.46424	-4.25602	3.40307e-05	0.000294801	1.77749
HES5	-0.629266	1.19078	4.25355	3.43718e-05	0.000297225	1.76808
CHST6	1.13795	2.51922	-4.24547	3.55133e-05	0.000306005	1.73723
NR4A1	1.05932	4.03793	-4.24373	3.57634e-05	0.00030734	1.73061
SOX9	0.969604	5.34803	-4.2435	3.57961e-05	0.000307407	1.72974
LDLRAD1	0.89996	1.15881	-4.24204	3.6008e-05	0.000308579	1.72417
LRRN1	1.23455	1.96029	-4.24007	3.62947e-05	0.000310393	1.71668
TH	0.67073	0.839738	-4.23764	3.66532e-05	0.000313045	1.70741
CD53	-0.770456	5.44068	4.23704	3.67409e-05	0.000313518	1.70515
SYNM	-0.61853	2.93373	4.23488	3.70628e-05	0.000315751	1.69692
SLAMF7	-0.875856	3.52756	4.23479	3.70759e-05	0.000315751	1.69658
TENM4	-0.690329	1.61923	4.23318	3.73174e-05	0.00031746	1.69045
AGT	0.826772	1.3718	-4.232	3.74947e-05	0.000318829	1.68598
ERICH5	1.05915	1.8271	-4.22918	3.79236e-05	0.000322193	1.67524
NPTXR	0.968771	2.70535	-4.22822	3.80709e-05	0.000323303	1.67158
CDHR1	-0.709847	1.26758	4.22798	3.81077e-05	0.000323474	1.67067
TJP3	1.16823	4.68315	-4.22605	3.84039e-05	0.000325276	1.66337
TMEM63A	0.61845	3.95247	-4.2227	3.89259e-05	0.000329122	1.65063
SH3BGRL2	1.01184	3.75916	-4.22022	3.93163e-05	0.000331989	1.64121
AQP7	0.63715	0.625165	-4.21963	3.94098e-05	0.000332634	1.63897
SLC35G2	-0.713766	2.94707	4.2169	3.98435e-05	0.00033571	1.62864
SOX2	-1.69353	5.41046	4.20909	4.11133e-05	0.000345209	1.59904
ANPEP	1.12924	3.81657	-4.20592	4.164e-05	0.000349178	1.58703
CDH4	0.585876	0.588353	-4.20315	4.21045e-05	0.000352921	1.57657
SLC38A8	0.631853	0.359607	-4.20285	4.21554e-05	0.000353195	1.57543
FGL2	-0.837883	3.7062	4.20198	4.23016e-05	0.000354267	1.57216
SLCO4A1	0.991034	3.62767	-4.20159	4.23682e-05	0.000354671	1.57068
FOXD3	-0.744357	1.72062	4.19922	4.27727e-05	0.00035744	1.56172
GATA2	0.788714	3.40096	-4.1972	4.31197e-05	0.00036003	1.55409
MYC	-1.03014	6.68927	4.19633	4.32701e-05	0.000361131	1.55081
ALDH1A2	0.935133	1.63501	-4.19618	4.32967e-05	0.000361197	1.55023
SCEL	-1.25497	3.65038	4.19012	4.43587e-05	0.000368629	1.52738
RCSD1	-0.657874	2.53009	4.18993	4.43941e-05	0.000368766	1.52663
KIFC3	0.657002	4.21418	-4.1897	4.44332e-05	0.000368933	1.52579
STMN2	0.684914	1.04796	-4.18828	4.46867e-05	0.000370879	1.52043
VANGL2	-0.851219	5.08632	4.18557	4.51746e-05	0.000374015	1.51019
MCF2L	0.770637	1.98948	-4.18552	4.5182e-05	0.000374015	1.51004
FAM13A	0.58991	2.37033	-4.18532	4.52187e-05	0.000374015	1.50927
SLC39A14	0.669177	4.17364	-4.18521	4.52382e-05	0.000374015	1.50886
AMIGO2	0.996777	3.66372	-4.1847	4.53314e-05	0.000374626	1.50692
BAIAP3	0.676417	1.79029	-4.18351	4.55468e-05	0.000375825	1.50245
DLX4	0.671429	1.87017	-4.17993	4.62033e-05	0.000380858	1.48896
LAMB1	0.771214	5.54911	-4.17888	4.63965e-05	0.000381963	1.48503
L1CAM	1.05721	1.64744	-4.17335	4.74316e-05	0.000389659	1.46422
ATP2A3	0.906058	4.28697	-4.17312	4.74749e-05	0.000389684	1.46336
CHST7	-0.600571	3.23671	4.16846	4.83651e-05	0.000395985	1.44585
CYBB	-0.81373	4.45337	4.16633	4.87786e-05	0.000398866	1.43783
CXCL9	-1.44165	5.75814	4.16475	4.90865e-05	0.000400877	1.4319
GNA14	0.674309	1.42115	-4.16146	4.97339e-05	0.000404801	1.41955
MYRF	1.07957	2.56827	-4.15919	5.01846e-05	0.00040784	1.41104
LYPD5	-0.707066	3.79448	4.1591	5.0203e-05	0.00040784	1.4107
ZNF853	0.715086	2.08908	-4.15359	5.13144e-05	0.000416279	1.39006
LAMB2	0.736061	5.4807	-4.15265	5.15055e-05	0.000417643	1.38656
TP53I11	0.811069	5.08584	-4.14951	5.21534e-05	0.000422542	1.37478
GPR160	0.876287	3.32658	-4.14624	5.28335e-05	0.000427517	1.36257
PTPRC	-0.792249	3.63102	4.14593	5.28992e-05	0.00042787	1.3614
HTR3A	0.907577	1.08643	-4.14424	5.32563e-05	0.000430276	1.35507
REC8	0.994636	4.88226	-4.14402	5.33014e-05	0.000430406	1.35427
ABO	-1.23939	3.27911	4.14317	5.34817e-05	0.000431502	1.35109
FAM110C	-0.789004	5.11919	4.14004	5.41496e-05	0.000436165	1.33939
SPRR2G	-1.50962	1.72749	4.13757	5.46834e-05	0.000439716	1.33015
EVI2B	-0.723671	3.85529	4.13747	5.47038e-05	0.000439716	1.3298
CXCL10	-1.4605	7.08335	4.13292	5.56989e-05	0.000446789	1.31282
TUBA4B	0.654904	0.702533	-4.12854	5.66726e-05	0.000453847	1.2965
ZNF160	0.622478	2.94831	-4.12843	5.66981e-05	0.000453847	1.29608
CNFN	-1.18326	6.54496	4.12672	5.70839e-05	0.0004562	1.28969
SMPDL3A	-0.688633	4.13542	4.12391	5.77206e-05	0.00046053	1.27924
SASH3	-0.684565	4.14818	4.12217	5.81203e-05	0.000463338	1.27274
TM4SF1	-0.881735	7.65256	4.11185	6.05359e-05	0.00048062	1.2344
DACT2	1.04179	1.78965	-4.10947	6.11073e-05	0.000484562	1.22556
SYT17	0.614096	2.91369	-4.10878	6.12749e-05	0.000485692	1.22298
MT1A	0.794435	1.24766	-4.10547	6.20783e-05	0.000491056	1.21072
ERP27	0.910763	2.39576	-4.10494	6.22095e-05	0.000491693	1.20873
IQANK1	-0.655082	5.52676	4.10206	6.29188e-05	0.000495885	1.19806
EDARADD	-0.871407	2.99822	4.10046	6.33169e-05	0.000498415	1.19212
RIMBP2	0.594881	0.587747	-4.09905	6.36685e-05	0.00050037	1.18691
ABCA13	-0.969577	1.79797	4.0983	6.38566e-05	0.00050124	1.18413
ARL4D	-0.715156	6.36276	4.09785	6.39693e-05	0.000501515	1.18247
CRYM	1.10714	1.39694	-4.09677	6.42409e-05	0.000503237	1.17848
BDKRB1	-0.725358	2.46421	4.09248	6.53344e-05	0.00051139	1.1626
PROM2	-0.832836	6.74962	4.0918	6.55106e-05	0.000512524	1.16007
KANK4	0.755347	0.723136	-4.08464	6.73798e-05	0.000524227	1.13359
SOWAHC	-0.707615	4.97885	4.08256	6.79319e-05	0.000527676	1.12592
CCK	0.666123	0.764788	-4.08023	6.85543e-05	0.000531872	1.11733
VPS37D	0.79228	1.82991	-4.07706	6.94139e-05	0.000537895	1.10561
ACAA2	0.743409	3.71858	-4.07058	7.11967e-05	0.000550611	1.08176
CLIC2	-0.855694	3.60097	4.06966	7.14535e-05	0.000552156	1.07837
CASP1	-0.66402	4.76266	4.06876	7.17069e-05	0.000553894	1.07504
CTSF	0.629302	5.53833	-4.06864	7.17411e-05	0.000553937	1.07459
PIP	1.05632	1.4634	-4.06697	7.22125e-05	0.000556912	1.06843
CDK14	0.711237	2.95296	-4.06589	7.25176e-05	0.000558599	1.06447
VWA2	0.888254	2.35163	-4.06398	7.30596e-05	0.000561881	1.05746
MYO15B	0.732331	3.22554	-4.06282	7.33922e-05	0.000563992	1.05319
INPP5F	-0.599613	4.35929	4.06239	7.35167e-05	0.000564725	1.0516
SPON2	0.776893	4.17837	-4.06064	7.40216e-05	0.000567928	1.04516
SLPI	1.17273	11.2203	-4.05627	7.52954e-05	0.000576789	1.02912
ICOS	-0.597666	1.95198	4.05505	7.56571e-05	0.000579102	1.02461
CCDC198	0.615505	0.348091	-4.05418	7.59135e-05	0.000580606	1.02143
NDRG2	-0.741294	5.17376	4.05361	7.60818e-05	0.000581664	1.01935
CTH	0.586092	2.06004	-4.05317	7.62136e-05	0.000581984	1.01772
MCOLN3	0.820665	1.83741	-4.0523	7.64717e-05	0.000583636	1.01454
HHLA2	0.711099	0.435645	-4.05224	7.64901e-05	0.000583636	1.01431
OTOP3	-0.667441	0.65854	4.05195	7.65783e-05	0.000584079	1.01323
FETUB	-0.982161	0.796044	4.04869	7.75563e-05	0.000590674	1.0013
ARHGAP26	0.679265	3.20003	-4.04277	7.93689e-05	0.000602049	0.979582
ST6GALNAC2	-0.634514	4.81837	4.04212	7.95689e-05	0.000602859	0.977216
CSF2RB	-0.636651	2.81904	4.04164	7.97172e-05	0.000603276	0.975466
RDH12	-0.788717	1.22966	4.03963	8.0344e-05	0.000607071	0.968105
SDCBP2	-0.881857	5.65183	4.03926	8.04598e-05	0.00060771	0.96675
CRYBG1	-0.608271	5.5111	4.03796	8.08689e-05	0.000610325	0.961983
TNS4	-1.14649	6.58153	4.03019	8.33513e-05	0.000627594	0.933568
BICC1	0.701171	1.76683	-4.02443	8.52386e-05	0.00063957	0.912529
SCARF2	0.619289	2.50972	-4.01994	8.67371e-05	0.000649557	0.896155
ZNF211	0.663039	2.93614	-4.01842	8.72499e-05	0.000653145	0.890617
IL17RB	0.772072	3.70575	-4.01782	8.74531e-05	0.000654161	0.888431
IFITM3	0.653966	10.3507	-4.0158	8.81405e-05	0.000658288	0.881076
ANKRD65	-0.835508	5.14479	4.01332	8.89934e-05	0.000664146	0.87203
ZNF738	0.905345	2.23256	-4.01315	8.90509e-05	0.000664319	0.871423
C4A	0.690759	1.4464	-4.01297	8.91127e-05	0.000664525	0.870772
PNLDC1	-1.11136	1.09136	4.01272	8.91994e-05	0.000664916	0.869858
ALOX15B	-1.16646	2.77048	4.01031	9.00342e-05	0.000670366	0.861107
MCIDAS	0.602046	1.86265	-4.00729	9.10937e-05	0.000677734	0.850119
LILRB4	-0.769799	2.78785	4.00646	9.1389e-05	0.000678907	0.84708
TMEM98	0.863276	3.86509	-4.0043	9.21558e-05	0.000683277	0.839232
JPH2	0.686529	1.36824	-4.00262	9.27575e-05	0.000686427	0.83312
FABP12	-0.615357	0.674985	3.99948	9.38907e-05	0.000693754	0.821717
FAM107A	0.969068	1.69155	-3.99857	9.4219e-05	0.000695203	0.818439
JAML	-0.633813	2.44446	3.99854	9.42302e-05	0.000695203	0.818327
SMIM10	0.627933	2.56172	-3.99821	9.43501e-05	0.000695823	0.817133
PGF	-0.73781	3.33217	3.99733	9.46718e-05	0.00069793	0.813937
ITGA6	-0.773439	6.86392	3.99649	9.49795e-05	0.000699136	0.81089
SERTM1	0.618994	0.468658	-3.99627	9.50631e-05	0.000699485	0.810064
PDE9A	0.80085	2.37737	-3.99592	9.51898e-05	0.000700152	0.808813
SAA2-SAA4	1.01165	2.13325	-3.99231	9.65276e-05	0.000708113	0.795709
CD164L2	-0.728861	2.00366	3.98883	9.78306e-05	0.000716317	0.78312
KCNK5	0.848838	3.7218	-3.98681	9.85974e-05	0.000721366	0.775791
LY86	-0.655765	3.20903	3.98672	9.86318e-05	0.000721366	0.775463
LYPD1	0.910471	2.41453	-3.98614	9.88524e-05	0.000722435	0.773366
CYBRD1	0.716328	5.07337	-3.98542	9.91266e-05	0.000723392	0.770766
FAIM2	0.5917	0.960294	-3.97867	0.000101741	0.00073992	0.746331
EPHX3	-1.31763	5.73721	3.97825	0.000101903	0.000740819	0.744839
PPP1R13L	-0.592055	6.45926	3.97756	0.000102174	0.000742058	0.742341
SLURP1	-1.34122	2.92739	3.97753	0.000102188	0.000742058	0.742215
GALNT7	0.741172	4.64162	-3.97423	0.000103493	0.000750134	0.730301
LCE3A	-1.00977	1.00024	3.9729	0.000104025	0.000753143	0.725493
VILL	0.83864	3.71679	-3.97267	0.000104116	0.000753521	0.724672
GPR153	-0.717329	4.41174	3.96982	0.000105263	0.000760971	0.71439
KIAA0319	0.598323	0.94883	-3.96953	0.000105379	0.000761527	0.713355
MT1X	-0.821505	7.34983	3.96885	0.000105657	0.000762678	0.710889
SERPINA1	1.06187	5.23563	-3.96373	0.000107758	0.000775825	0.692411
CLGN	1.0977	2.23635	-3.96331	0.000107929	0.000776478	0.690925
MS4A6A	-0.684792	3.70843	3.96231	0.000108344	0.000779178	0.687321
ZG16B	1.05645	2.97359	-3.95918	0.000109653	0.000787617	0.676052
MAPRE3	-0.608881	3.93923	3.95796	0.000110169	0.000790544	0.671649
COL9A3	0.735783	1.64045	-3.95615	0.000110935	0.00079508	0.665152
CDHR2	0.64118	0.750217	-3.95563	0.00011116	0.000795888	0.663249
MUC6	0.959902	0.75944	-3.95313	0.00011223	0.000802068	0.654263
EVI2A	-0.618849	3.03276	3.95215	0.000112651	0.000804189	0.650749
NRGN	0.685236	4.06691	-3.95018	0.000113507	0.000809606	0.643655
SMKR1	0.714732	2.28816	-3.95001	0.00011358	0.000809628	0.643048
RIPPLY3	0.862122	2.83366	-3.94779	0.00011455	0.000815346	0.635068
VAV3	-0.842777	4.91115	3.94341	0.000116485	0.000827292	0.619365
CDH2	0.891678	1.53964	-3.9421	0.000117071	0.000830547	0.614653
MNS1	0.774334	3.08878	-3.94109	0.000117523	0.000831778	0.611043
SLC25A27	0.650091	2.32846	-3.94104	0.000117545	0.000831778	0.610867
CCN2	1.00529	6.522	-3.93396	0.00012077	0.000851308	0.585486
TRNP1	1.01845	4.12942	-3.9329	0.00012126	0.000853462	0.58169
C3AR1	-0.697596	3.65668	3.93288	0.000121269	0.000853462	0.581618
FYB1	-0.710111	3.28785	3.93275	0.00012133	0.000853578	0.58115
NGB	-1.08369	1.32787	3.93191	0.000121717	0.00085599	0.578165
ACBD7	0.731997	1.74454	-3.93175	0.000121795	0.000856231	0.577562
MPEG1	-0.659135	3.60908	3.93159	0.000121867	0.000856427	0.577007
MS4A1	-0.696282	1.25727	3.93117	0.000122064	0.000857497	0.575497
DUSP10	-0.614767	4.57783	3.92738	0.000123842	0.000868418	0.561936
HBEGF	-0.807323	4.731	3.92609	0.00012445	0.000872268	0.557345
TGFB2	0.877443	2.23092	-3.92418	0.000125364	0.0008775	0.550492
CYP4F22	-0.604945	1.03348	3.92267	0.000126085	0.000881596	0.545112
C1QC	-0.911361	7.72633	3.92138	0.000126706	0.000884662	0.540508
TNFSF11	0.592817	1.17577	-3.91456	0.00013004	0.000903722	0.516165
TAAR1	0.671698	0.373218	-3.91433	0.000130156	0.000904193	0.515331
SMC1B	-0.989058	3.57065	3.91275	0.000130938	0.000908059	0.509716
ALOXE3	-0.734459	1.48347	3.90868	0.000132982	0.000918889	0.495202
FOXL1	0.903283	2.11687	-3.90723	0.000133714	0.000922628	0.490063
MSX2	0.891754	2.0013	-3.90605	0.000134319	0.000925163	0.485828
SOX17	0.964383	1.82595	-3.90574	0.000134474	0.000925684	0.484747
NTF4	-0.709324	2.55744	3.90276	0.000136007	0.000934666	0.474131
CCN1	0.908119	6.5707	-3.90172	0.000136542	0.00093704	0.470452
SLC7A8	-0.814909	4.8201	3.90002	0.000137426	0.000942211	0.464406
CRYBG3	-0.735101	2.56335	3.89397	0.000140615	0.000959331	0.442915
CD48	-0.721772	3.48015	3.89286	0.000141209	0.000962702	0.43897
POF1B	-1.28225	3.83994	3.89092	0.000142251	0.000969123	0.432086
MSR1	-0.641606	2.5439	3.89065	0.000142399	0.00096945	0.431112
PLAU	-0.801179	7.07957	3.88905	0.000143263	0.000974995	0.425442
PACSIN1	0.627372	1.14867	-3.88597	0.000144943	0.000984355	0.414525
TFAP2C	-0.591576	5.69528	3.88218	0.000147035	0.000997167	0.401106
ACSL1	-0.615248	4.87834	3.88137	0.000147486	0.000999666	0.398242
NAT8L	0.633145	0.701335	-3.87999	0.00014826	0.00100407	0.39334
GLB1L2	0.860774	2.6366	-3.87828	0.000149219	0.00100915	0.387302
CEL	-1.16379	3.54039	3.87608	0.000150466	0.00101617	0.379511
TBX6	-0.683918	3.20112	3.87582	0.000150614	0.00101681	0.378591
PPP1R14D	0.821865	1.23795	-3.87547	0.000150812	0.0010178	0.37736
BMP3	1.00994	1.5335	-3.87119	0.000153269	0.00103258	0.362234
C16orf89	0.777288	0.790805	-3.8704	0.000153728	0.00103531	0.359434
COL4A2	0.703628	6.20082	-3.8664	0.000156069	0.00104852	0.345289
ARHGEF26	-0.713827	2.81529	3.86251	0.000158372	0.0010607	0.331575
PLEKHH1	0.616431	2.57947	-3.86007	0.000159834	0.00106791	0.322975
FAM107B	0.758417	4.63313	-3.85614	0.000162213	0.00108157	0.309153
KRT9	-0.848415	1.59716	3.85447	0.000163236	0.00108764	0.303271
IQGAP2	0.80917	2.87481	-3.8543	0.000163345	0.00108799	0.302646
TGFBR2	0.668615	5.10624	-3.8536	0.000163774	0.00108968	0.300188
CNTN1	-0.913979	1.96314	3.85352	0.000163823	0.00108968	0.299908
CELSR2	-0.592248	5.41976	3.85067	0.000165591	0.00110031	0.289868
NR1D1	-0.630979	5.2644	3.85025	0.000165848	0.0011011	0.288417
CXCL14	-1.43306	6.20757	3.84915	0.000166535	0.00110469	0.284549
SPAG17	-0.698781	1.63851	3.84826	0.000167096	0.00110765	0.281404
CCR5	-0.734451	3.07663	3.848	0.000167258	0.00110797	0.280497
SMIM10L2A	-0.588826	1.42239	3.84543	0.00016888	0.00111605	0.271468
EFNA2	0.631536	0.774001	-3.84517	0.000169044	0.00111675	0.270561
ARHGAP4	-0.618376	5.77608	3.84497	0.000169175	0.0011169	0.269835
FIBCD1	0.751908	1.08008	-3.84408	0.000169738	0.00111943	0.266729
IL10RA	-0.626753	3.21061	3.84298	0.000170443	0.00112288	0.262852
FABP6	-0.897063	1.53139	3.83843	0.000173379	0.00113956	0.246877
P2RY13	-0.59514	1.86149	3.83759	0.000173924	0.00114276	0.243941
IGSF6	-0.607528	3.25056	3.83735	0.000174079	0.001143	0.243107
MPZL2	-0.669046	6.801	3.83672	0.000174493	0.00114534	0.240885
GDAP1	-0.640165	2.93483	3.8359	0.000175026	0.00114806	0.238032
ZNF329	0.605012	2.8775	-3.83107	0.000178224	0.00116391	0.221102
HERC6	-0.695858	4.52605	3.82967	0.000179159	0.00116884	0.216207
SAMSN1	-0.592445	3.14367	3.82834	0.000180056	0.00117391	0.211535
CD4	-0.698592	4.7419	3.82821	0.000180146	0.0011741	0.211068
ANXA4	0.589964	5.72641	-3.82782	0.00018041	0.00117506	0.209698
HKDC1	0.920762	1.59989	-3.82529	0.000182122	0.00118578	0.200867
LRG1	1.0067	4.91398	-3.82349	0.000183353	0.00119299	0.194573
PTPRU	0.79531	5.09125	-3.82084	0.00018518	0.00120326	0.185304
ERN2	1.38502	2.6534	-3.81984	0.000185873	0.00120736	0.181812
HPGD	-1.00147	2.7019	3.81923	0.000186299	0.00120973	0.179669
RNASE6	-0.629238	4.50165	3.81477	0.000189425	0.00122674	0.164115
CGNL1	0.671781	1.8096	-3.81463	0.000189525	0.00122694	0.163623
OAS1	-0.631971	6.27696	3.81455	0.000189582	0.00122694	0.163341
TNNT3	-0.900131	1.49266	3.80377	0.000197362	0.00127135	0.125753
FAM43A	-0.802421	4.38114	3.80214	0.000198558	0.0012782	0.120111
TMEM45A	-1.07159	4.48909	3.79888	0.000200989	0.00129043	0.108741
PRR5L	0.668537	2.91195	-3.79714	0.00020229	0.00129749	0.10271
SIGLEC1	-0.679512	2.49013	3.79652	0.000202762	0.00130009	0.100536
SIX3	0.829535	0.822045	-3.79434	0.000204407	0.0013089	0.0929875
CHGA	0.907007	0.725308	-3.79334	0.000205169	0.00131335	0.0895101
CD1A	-0.937796	2.541	3.79095	0.000206998	0.00132195	0.0812201
CHIT1	-0.899249	1.63933	3.79078	0.00020713	0.00132195	0.0806241
FCER1G	-0.722226	6.44124	3.78632	0.000210591	0.00134098	0.0651432
PMAIP1	-0.629048	5.69713	3.78442	0.000212084	0.00135004	0.0585488
HOXC8	0.589714	1.72927	-3.77826	0.000216986	0.00137628	0.0372078
GCNT2	0.742023	2.49053	-3.77779	0.00021736	0.0013782	0.0355995
COL9A2	0.998441	4.53981	-3.77278	0.000221437	0.0014013	0.0182505
ZNF607	0.602826	2.11088	-3.76671	0.000226463	0.00143031	-0.00270343
MROH6	0.6307	4.728	-3.76268	0.000229869	0.00144899	-0.016636
BIRC7	0.658775	1.27411	-3.76169	0.000230708	0.00145333	-0.0200365
KLC3	-0.812524	3.23882	3.76052	0.000231708	0.00145821	-0.0240742
SLAMF8	-0.724594	3.7786	3.75963	0.00023247	0.00146206	-0.0271391
LYPD6	0.64958	2.52697	-3.75896	0.000233048	0.00146413	-0.0294567
MARK1	-0.63106	3.89761	3.75522	0.000236285	0.00147981	-0.0423282
CDH3	-0.816291	7.24325	3.75467	0.000236763	0.00148185	-0.0442144
KLF4	-0.715511	6.01518	3.75268	0.000238508	0.00149037	-0.0510668
SYT13	0.733731	0.761192	-3.75224	0.000238899	0.00149229	-0.052598
GPC2	-0.621093	2.00756	3.751	0.000239995	0.00149581	-0.0568681
TMEM238L	0.739277	0.822785	-3.7496	0.000241233	0.00150111	-0.0616668
MUC2	0.830271	1.02303	-3.74716	0.000243417	0.00150939	-0.0700769
PSORS1C2	-1.07411	2.33171	3.74572	0.000244711	0.00151541	-0.075025
RHBDL1	0.687923	2.79407	-3.74513	0.000245237	0.00151774	-0.0770248
FSTL3	0.787549	4.51575	-3.74442	0.000245882	0.00152028	-0.0794751
SLCO2B1	-0.634205	2.7906	3.74305	0.000247121	0.00152697	-0.0841646
ITGA2B	0.653046	1.93044	-3.74277	0.000247384	0.00152811	-0.0851577
SH3GL3	-0.659723	1.25811	3.73977	0.000250126	0.00154308	-0.0954394
CAV2	-0.657567	4.83245	3.73893	0.000250902	0.00154738	-0.0983311
FA2H	0.809321	3.40767	-3.73571	0.000253886	0.0015628	-0.109358
PRAC2	0.995289	1.35976	-3.73338	0.000256068	0.00157374	-0.117337
AKR1B1	-0.627084	5.76872	3.72495	0.000264123	0.00161361	-0.14622
PTPRG	0.64022	2.38843	-3.72327	0.000265756	0.00162247	-0.151965
SALL4	0.753823	1.66583	-3.71904	0.000269909	0.00164111	-0.166422
ARNT2	0.777278	2.24336	-3.71865	0.00027029	0.00164222	-0.167737
TRIB3	0.652297	4.57427	-3.7186	0.000270345	0.00164222	-0.167927
SST	1.18717	0.964724	-3.71319	0.00027575	0.00166878	-0.186381
MT1F	0.58888	4.0089	-3.71198	0.000276977	0.00167569	-0.190519
FMO1	-0.619575	1.66974	3.71098	0.00027799	0.00168077	-0.193922
ADRB2	-0.909691	3.13709	3.70601	0.000283083	0.00170509	-0.21084
PLA2G3	-0.90211	2.12689	3.702	0.000287263	0.00172394	-0.224499
TTC39A	0.744107	2.83168	-3.69698	0.000292575	0.00175202	-0.241571
DEGS2	1.06681	3.05578	-3.69562	0.000294026	0.00175853	-0.246177
SELENOP	-1.05106	4.39834	3.69528	0.000294387	0.00175961	-0.247322
C1QB	-0.949579	7.63567	3.69417	0.000295587	0.00176515	-0.251113
PDE4C	0.6862	1.22898	-3.69295	0.000296902	0.00177191	-0.255248
GJC1	0.652246	2.31245	-3.6923	0.000297609	0.00177558	-0.257462
ALDH1A3	-0.863703	3.62196	3.69042	0.000299652	0.00178612	-0.263834
CCDC74A	0.742276	3.09879	-3.68659	0.000303861	0.00180732	-0.276825
ARX	0.587569	0.389672	-3.6863	0.000304182	0.00180868	-0.277809
SLC5A5	0.762338	1.14584	-3.68471	0.000305949	0.00181752	-0.283204
CCDC190	-0.894117	0.964372	3.68436	0.000306337	0.00181926	-0.284384
RND3	-0.612012	6.44606	3.68337	0.000307443	0.00182385	-0.287741
DST	-0.877551	4.12577	3.68304	0.000307811	0.00182522	-0.288855
TYROBP	-0.711261	6.97804	3.68135	0.00030971	0.00183536	-0.29458
ITGB2	-0.685723	4.99324	3.68007	0.000311157	0.00184225	-0.298922
LMO7	0.621035	4.22935	-3.67961	0.000311675	0.00184475	-0.30047
SALL1	0.651013	1.13601	-3.67791	0.000313606	0.00185308	-0.306222
DOK2	-0.60414	3.64197	3.67348	0.00031869	0.00187824	-0.321193
TSPAN1	1.20722	7.05652	-3.67093	0.00032166	0.00189288	-0.329832
CDH16	1.16506	1.49002	-3.66906	0.000323843	0.00190168	-0.336126
PROC	0.6654	1.86865	-3.66812	0.000324953	0.00190705	-0.339312
PLAAT4	0.816319	6.8966	-3.66315	0.00033086	0.00193614	-0.356081
SLC46A3	0.587654	2.80246	-3.65768	0.000337482	0.00196689	-0.374522
HAVCR2	-0.62705	3.56444	3.65531	0.000340385	0.00198136	-0.382491
SLC8A2	-0.753273	1.11615	3.65523	0.000340476	0.00198136	-0.38274
FHL2	0.6738	5.12132	-3.65178	0.000344752	0.00200324	-0.394352
HK3	-0.634522	2.55633	3.64757	0.00035004	0.0020285	-0.408515
EPDR1	0.739354	2.46325	-3.64363	0.000355047	0.00205383	-0.421727
MLXIPL	0.659773	0.9896	-3.64328	0.000355504	0.00205586	-0.422921
UGT1A7	-0.757597	0.609886	3.64056	0.000359004	0.00207239	-0.432034
SHISA2	0.906114	2.03995	-3.63665	0.000364104	0.00209747	-0.445155
RNF183	0.835306	1.85262	-3.63578	0.00036524	0.00210214	-0.448051
GAD1	0.613482	1.87389	-3.63444	0.000367015	0.00211106	-0.45256
EMID1	0.807054	2.2251	-3.63436	0.000367117	0.00211106	-0.452818
TLE2	0.880575	4.41204	-3.63283	0.000369148	0.00212123	-0.457948
PDK4	0.839157	1.97024	-3.62976	0.000373246	0.00213933	-0.468213
CAP2	0.652941	2.69092	-3.62732	0.000376543	0.00215567	-0.476389
BIRC3	0.895788	4.49528	-3.62509	0.000379571	0.00217045	-0.483835
PDGFRL	0.72382	2.6272	-3.62418	0.000380813	0.00217672	-0.486872
RIPK4	-0.623542	5.81928	3.62377	0.000381373	0.00217819	-0.488239
CA9	1.24731	5.54384	-3.622	0.00038381	0.00218952	-0.49416
VAX2	0.69181	2.26392	-3.61349	0.000395716	0.00224912	-0.522553
UNC5B	-0.623081	5.15321	3.61325	0.000396048	0.00225007	-0.523332
TREM2	-0.831182	4.67883	3.61187	0.000398012	0.00225859	-0.527929
REEP2	0.628455	1.80363	-3.60778	0.000403889	0.00228658	-0.541548
RAB36	0.70224	2.83054	-3.60688	0.000405202	0.00229287	-0.544563
IRX4	-1.27166	2.47286	3.60456	0.000408568	0.00230983	-0.552251
ZNF320	0.678974	2.36092	-3.6045	0.000408663	0.00230983	-0.552465
CCR1	-0.595385	3.05456	3.60447	0.000408709	0.00230983	-0.552571
CLPSL1	0.758301	1.09377	-3.60123	0.000413474	0.00232978	-0.563339
SERPINB11	-0.878202	1.19088	3.60117	0.000413562	0.00232978	-0.563536
SIGLEC10	-0.610596	2.74636	3.60098	0.00041384	0.00233067	-0.56416
TCHH	-0.768919	1.1997	3.59954	0.000415974	0.00234065	-0.568937
MKX	0.604279	1.15837	-3.59755	0.000418946	0.0023567	-0.575552
EFHC2	0.703159	1.44741	-3.59718	0.000419504	0.00235827	-0.576787
SLC12A6	-0.59463	4.22262	3.59498	0.000422807	0.00237291	-0.584072
IFITM1	0.720616	9.18934	-3.59197	0.000427382	0.00239581	-0.594068
TLR5	-0.637981	3.24014	3.59023	0.000430042	0.00240863	-0.599829
PAX9	-0.778026	2.98891	3.58849	0.000432719	0.00242083	-0.605591
RNF152	-0.691073	3.20615	3.58495	0.00043822	0.00244666	-0.617321
GPT	0.694744	2.09457	-3.58221	0.000442516	0.00246852	-0.626378
RAP1GAP	0.886515	3.2211	-3.57828	0.000448751	0.00249702	-0.639368
FRAS1	0.708244	1.65437	-3.5772	0.000450495	0.00250582	-0.642967
VWA5A	0.625999	3.55039	-3.56765	0.000466039	0.00257897	-0.674452
S100A3	-0.716136	4.2033	3.56692	0.00046726	0.00258499	-0.676878
ATP6V0A4	0.722817	1.08823	-3.56527	0.000470009	0.00259649	-0.682322
ZNF253	0.592976	2.10823	-3.56366	0.000472697	0.00260911	-0.687614
CFI	0.925179	4.09025	-3.56316	0.000473541	0.00261303	-0.689268
EYA1	0.609018	0.650117	-3.55827	0.000481826	0.00265422	-0.705361
JSRP1	0.740647	2.35056	-3.55741	0.000483282	0.00266148	-0.708159
TNFAIP8L3	-0.61795	2.61217	3.55001	0.000496116	0.00271766	-0.73247
NUDT11	-0.762225	1.76344	3.54544	0.0005042	0.00275013	-0.74746
HOXC6	0.662328	2.48979	-3.54283	0.000508883	0.00276991	-0.756031
B4GALNT1	-0.66199	1.45495	3.54205	0.000510282	0.0027755	-0.758577
CITED4	0.641448	6.18254	-3.53957	0.000514779	0.00279797	-0.766712
VLDLR	-0.60652	3.55338	3.53953	0.000514845	0.00279797	-0.766832
RSAD2	-0.807034	4.19352	3.53728	0.000518956	0.00281478	-0.774204
PARD6A	0.59059	3.62606	-3.53658	0.000520234	0.00282093	-0.776485
SYDE1	0.663153	3.4268	-3.53504	0.000523075	0.00283396	-0.781533
CCDC68	0.607191	1.88595	-3.53277	0.000527267	0.0028503	-0.788933
ABCA12	-0.696032	2.37948	3.52412	0.000543582	0.0029287	-0.817175
SAMD9L	-0.652832	3.86519	3.51973	0.000552059	0.00296777	-0.831513
ADRA2C	0.878995	2.88324	-3.51816	0.000555114	0.0029809	-0.836626
SOWAHB	-0.661752	3.13438	3.51625	0.000558844	0.0029976	-0.84283
ADGRB2	0.619603	2.13532	-3.51149	0.000568268	0.00303473	-0.858322
ANKRD35	-0.845592	3.10953	3.51065	0.000569942	0.00304283	-0.861046
TMEM61	0.640356	1.87934	-3.50542	0.000580496	0.00308982	-0.878039
CRABP1	0.991533	1.06083	-3.49383	0.000604526	0.00320191	-0.915594
FABP4	-1.65144	2.86644	3.48321	0.000627387	0.00330315	-0.94995
EPB41L4B	0.661274	2.88001	-3.48004	0.000634362	0.00333516	-0.960181
OLFM1	-0.931231	2.78058	3.47827	0.000638276	0.00335088	-0.965873
EFNA5	0.599503	3.67143	-3.47454	0.000646626	0.00338606	-0.977897
BARX2	-1.07923	3.92122	3.47349	0.000649005	0.00339668	-0.981295
MESP1	0.672237	2.48458	-3.47297	0.000650182	0.003401	-0.98297
S100A7	-2.12236	6.65651	3.47134	0.000653884	0.0034176	-0.988222
LRRC17	0.810248	1.7215	-3.46948	0.00065812	0.00343789	-0.994195
SMIM3	-0.597856	4.95821	3.46915	0.000658878	0.00344093	-0.995261
MS4A4A	-0.614106	3.05293	3.46842	0.00066055	0.00344534	-0.997604
CYP4B1	-1.2309	3.12915	3.46819	0.000661076	0.00344684	-0.99834
GLB1L	0.603969	3.20064	-3.46775	0.000662094	0.00344848	-0.999763
PLEKHG4B	0.6696	1.47161	-3.46658	0.000664796	0.00346132	-1.00353
EPHA4	-0.67907	2.68557	3.46652	0.000664924	0.00346132	-1.00371
ELOVL4	-0.817176	2.00777	3.46607	0.000665971	0.00346529	-1.00516
MMP7	1.33681	4.65085	-3.45933	0.000681753	0.00353374	-1.02682
SPRY4	0.605592	2.97196	-3.45874	0.000683132	0.00353995	-1.02869
CD40	-0.631741	5.22545	3.45192	0.000699499	0.00361126	-1.05058
GABRE	-0.815748	4.55596	3.4513	0.000700996	0.00361706	-1.05255
BEX2	-1.11122	3.63065	3.45044	0.000703086	0.00362393	-1.05531
LBP	0.610123	0.563023	-3.44796	0.000709154	0.00364944	-1.06325
RIMKLA	0.614755	1.10565	-3.44777	0.000709606	0.00364988	-1.06384
SH2D1A	-0.60556	2.08887	3.44702	0.000711465	0.00365648	-1.06626
RRAD	1.24783	4.68318	-3.44675	0.000712135	0.00365821	-1.06713
ECHDC3	-0.879893	3.82088	3.43889	0.000731751	0.00374388	-1.09224
AKR1C1	-0.960263	2.69223	3.43847	0.000732818	0.00374637	-1.09358
HAS2	-0.823348	2.07402	3.43767	0.000734856	0.00375345	-1.09615
LCP1	-0.602479	5.78498	3.43617	0.00073865	0.00376824	-1.10091
CRISP3	1.20648	1.6677	-3.4342	0.000743708	0.00379006	-1.10721
CXCL13	-1.16333	4.43447	3.4339	0.000744468	0.00379293	-1.10815
SLC28A3	-0.692301	3.04743	3.43133	0.000751105	0.00382261	-1.11635
SERPINB3	-1.55984	7.30906	3.43015	0.000754164	0.00383528	-1.12011
NPBWR1	-0.635475	1.11458	3.42904	0.000757062	0.00384699	-1.12365
CYP4F3	-0.948804	3.06665	3.42332	0.000772133	0.0039123	-1.14186
EPS8L1	0.632198	5.59796	-3.42078	0.000778903	0.00394043	-1.14992
SPRY1	0.660761	3.73566	-3.4185	0.000785051	0.00396843	-1.15718
HOXC11	0.688691	2.14912	-3.4159	0.000792094	0.00399778	-1.16542
ANXA10	0.635482	0.685887	-3.41442	0.000796143	0.00401299	-1.17013
FGFR4	0.620352	2.28093	-3.41369	0.000798146	0.00401995	-1.17245
SCNN1B	-1.06766	3.80774	3.41171	0.000803595	0.0040432	-1.17873
CT83	1.21705	1.24733	-3.40523	0.000821667	0.00412023	-1.19926
MATN3	0.72043	1.92215	-3.40437	0.000824098	0.00413136	-1.20198
VMO1	0.794081	4.5221	-3.39216	0.00085929	0.00428893	-1.24056
CTSV	0.630784	5.23162	-3.3904	0.000864467	0.00430923	-1.2461
GIMAP7	-0.62743	4.04912	3.38946	0.000867263	0.00431906	-1.24908
GIMAP4	-0.585894	4.50063	3.38943	0.000867331	0.00431906	-1.24915
IGFBP7	0.586937	8.00281	-3.37971	0.000896602	0.00443748	-1.27976
ITGAL	-0.622834	3.24882	3.37643	0.000906686	0.00448053	-1.29007
NECTIN3	0.639895	1.83346	-3.3752	0.000910499	0.00449708	-1.29394
UPK3A	0.597556	1.00242	-3.37431	0.000913258	0.00450727	-1.29673
KRT81	1.08053	2.85806	-3.37403	0.000914129	0.00450927	-1.29761
RAC3	0.604245	4.8105	-3.37155	0.000921898	0.00453523	-1.30541
FXYD3	-0.689747	8.89381	3.37152	0.000921986	0.00453523	-1.3055
SUSD2	0.677773	2.33136	-3.36939	0.000928707	0.00456377	-1.31219
VGLL1	0.929739	2.48627	-3.36862	0.000931145	0.00457459	-1.31461
PALMD	-0.618258	2.96516	3.36727	0.000935427	0.00459214	-1.31884
SLC6A8	-0.700026	6.38273	3.3658	0.000940123	0.00460703	-1.32345
CUEDC1	0.602809	5.12188	-3.36495	0.000942816	0.00461789	-1.32609
RARB	-0.734058	3.03817	3.36392	0.000946128	0.00462711	-1.32932
HOXB8	1.14122	2.91764	-3.35535	0.000974082	0.00474229	-1.35615
CACNA2D1	-0.660758	1.85433	3.35203	0.000985099	0.00478691	-1.36651
LGALS4	1.05511	1.58922	-3.34732	0.00100096	0.00485485	-1.38121
APLN	0.742941	2.39214	-3.34427	0.00101132	0.00489901	-1.3907
RCOR2	0.6858	2.38215	-3.34418	0.00101164	0.00489934	-1.39099
S100P	1.31557	6.86259	-3.34141	0.00102116	0.00494421	-1.39962
S100A7A	-1.12508	1.78912	3.34023	0.00102526	0.00495908	-1.4033
FDCSP	-1.37933	2.09736	3.33816	0.00103244	0.00498637	-1.40973
FADS1	0.688601	4.03909	-3.33684	0.00103706	0.00500118	-1.41384
LY6G6C	-1.0288	2.77942	3.3362	0.00103931	0.00501079	-1.41583
IGFBP5	1.05838	5.4689	-3.33111	0.00105734	0.00507824	-1.43166
AKR7A3	0.789955	2.5841	-3.32976	0.00106215	0.00509811	-1.43584
AVPI1	0.622538	6.60397	-3.32704	0.00107194	0.00513747	-1.44428
MSX1	0.672078	2.61687	-3.32322	0.00108583	0.00519195	-1.45613
PLBD1	-0.601243	5.93136	3.32195	0.00109046	0.00520565	-1.46004
MX1	-0.670229	6.27446	3.32039	0.00109621	0.00522797	-1.46489
RTBDN	0.701164	1.15528	-3.32001	0.00109764	0.0052322	-1.46608
NGFR	-1.03332	3.12709	3.31958	0.0010992	0.00523833	-1.46739
AIF1	-0.60142	5.44418	3.31751	0.00110688	0.00526717	-1.47379
GALNT14	-0.900605	3.81975	3.31399	0.00112006	0.00532076	-1.48468
ADGRL2	-0.726237	3.71637	3.31389	0.00112044	0.00532126	-1.48499
[truncated: 200 more rows]
